# Supplementary material for: Pressurized formic acid dehydrogenation: an entropic spring replaces hydrogen compression cost
Source: Royal Society of Chemistry journal article supplement (doi:10.1039/d2cy00676f), 2022-01-01
Supplement: d2cy00676f1.pdf [file d2cy00676f1.pdf]

## Supporting Information

# Pressurized Formic Acid Dehydrogenation: An Entropic Spring Replaces Hydrogen Compression Cost

Van K. Do<sup>a</sup>, Nicolas Alfonso Vargas<sup>a</sup>, Anthony J. Chavez<sup>a</sup>, Long Zhang<sup>a</sup>, Valeriy Cherepakhin<sup>a</sup>, Zhiyao Lu<sup>a</sup>, Robert P. Currier<sup>b</sup>, Pavel A. Dub<sup>b</sup>, John C. Gordon<sup>c</sup>, and Travis J. Williams<sup>\*a</sup>

<sup>a</sup> Loker Hydrocarbon Research Institute, Wrigley Institute for Environmental Studies, and Department of Chemistry, University of Southern California, Los Angeles, California, 90089, USA.

<sup>b</sup> Chemistry Division, Los Alamos National Laboratory, Los Alamos, New Mexico 87545, United States.

<sup>c</sup> National Security Education Center (NSEC), Los Alamos National Laboratory, Los Alamos, New Mexico 87545, United States

### Table of Contents

|                                                                                                  |         |
|--------------------------------------------------------------------------------------------------|---------|
| 1. Theoretical Yield & Reaction Rate Calculations                                                | S2      |
| 2. Synthesis and Characterizations of Complex <b>11-CO</b> and <b>5</b>                          | S3-S7   |
| 3. Ambient Pressure Kinetics of All Screened Catalyst                                            | S8-S35  |
| 4. Effect of Various CO pressures on Reaction Kinetics of <b>9</b> , <b>9-CO</b> , and <b>10</b> | S36     |
| 5. X-ray Crystallography Data of <b>11-CO</b>                                                    | S37-S50 |
| 6. CO Reformation of <b>10</b>                                                                   | S50     |

## 1. Theoretical Yield & Reaction Rate Calculations

Based on the Ideal gas law equation and assuming 100% FA conversion from 3.00 mL (79.5 mmol) of FA, we would yield:

a. Ambient Pressure:

$$n_{\text{evolved gases}} = 159 \text{ mmol}$$

$$P = 1 \text{ atm}$$

$$R = 0.08206 \text{ L atm K}^{-1} \text{ mol}^{-1}$$

$$T = 25 \text{ }^{\circ}\text{C} + 273 = 298 \text{ K}$$

$$V = (n \cdot R \cdot T) / P = 3.89 \text{ Liter}$$

$$\text{FA conversion \%} = (V_{\text{evolved gas}} / 3.89) * 100$$

b. Self-Pressurized Conditions:

$$n_{\text{evolved gases}} = 0.159 \text{ mol}$$

$$R = 0.08206 \text{ L atm K}^{-1} \text{ mol}^{-1}$$

$$T = 110^{\circ}\text{C} + 273.15 = 383.15 \text{ K}$$

$$V = 0.125 \text{ L}$$

$$P = (n \cdot R \cdot T) / V = 39.99 \text{ atm} = 40.5 \text{ bar}$$

High-pressure H<sub>2</sub>/CO<sub>2</sub> mixtures cannot be precisely predicted by either the Ideal Gas Law or the Van der Waals' equation of state, therefore, we utilized the best catalytic run (table 1, entry 11) to be our standard 100% FA conversion yield. <sup>1</sup>H NMR at the end of entry 11 suggested there was no trace of unreacted FA left. Therefore, under self-pressurized condition conversion was calculated by:

$$\text{FA conversion \%} = (P_{\text{evolved gas}} / 38 \text{ bar}) * 100$$

All volumetric rate data is always expressed in normal liters per hour, (L/hr) standardized to 0 °C and 1 atm. An example calculation of a volumetric rate from pressure is shown below:

$$P_1 = 990 \text{ psi}; T_1 = 118 \text{ }^{\circ}\text{C}$$

$$P_2 = 1005 \text{ psi}; T_2 = 120 \text{ }^{\circ}\text{C}$$

$$V = 600 \text{ mL}$$

$$\Delta t = 8 \text{ s}$$

$$\Delta n = [P_2 / (273.15 \text{ K} + T_2) - P_1 / (273.15 \text{ K} + T_1)] / 14.7 \cdot V / 1000 / R$$

$$\text{Rate (L/hr)} = \Delta n \cdot R \cdot 273.15 \text{ K} / 1 \text{ atm} / (\Delta t / 3600) = 126.8 \text{ L/hr}$$

## 2. Synthesis and characterizations of Complex **11-CO** and **5**

**Complex 11-CO:** A solution of complex **11** (200 mg,  $2.91 \times 10^{-4}$  mol) and sodium formate (99 mg, 1.46 mmol, 5 eq.) in formic acid (20 mL) was stirred at room temperature under nitrogen for one hour. When the solution became yellow, it was heated in an oil bath for 4 hours at 90 °C. Then, the temperature was raised to 115 °C and the remaining formic acid was distilled off affording a red solid. The solid was extracted with  $\text{CH}_2\text{Cl}_2$ , filtered, and the resulting black-red solution was diluted with diethyl ether. The next day the product crystallized as dark-red crystals. They were filtered, washed with diethyl ether, and dried in vacuum (118 mg, 71%).

$^1\text{H}$  NMR (500 MHz,  $\text{CD}_2\text{Cl}_2$ ):  $\delta$  9.74 (d,  $J = 5.3$  Hz, 2H, ArH), 7.96 (t,  $J = 7.6$  Hz, 2H, ArH), 7.77 (d,  $J = 7.7$  Hz, 2H, ArH), 7.28 (t,  $J = 6.4$  Hz, 2H, ArH), 5.33 (s, 2H,  $\text{CH}_2\text{Cl}_2$ ), 3.75 (d,  $J = 8.2$  Hz, 4H, 2 $\text{CH}_2$ ), 1.41 (d,  $J = 13.7$  Hz, 36H, 12 $\text{CH}_3$ ),  $-0.09$  (t,  $^2J_{\text{PH}} = 56.4$  Hz, 1H, IrH).

$^{13}\text{C}\{^1\text{H}\}$  NMR (126 MHz,  $\text{CD}_2\text{Cl}_2$ ):  $\delta$  179.13, 166.74, 160.82, 140.51, 124.31, 124.02 (t,  $J = 4.8$  Hz), 37.24 – 36.64 (m), 36.21 – 35.76 (m), 29.22.

$^{19}\text{F}$  NMR (564 MHz,  $\text{CD}_2\text{Cl}_2$ ):  $\delta$   $-78.89$ .

$^{31}\text{P}\{^1\text{H}\}$  NMR (243 MHz,  $\text{CD}_2\text{Cl}_2$ ):  $\delta$  78.06 (s).

IR (KBr,  $\text{cm}^{-1}$ ): 2965, 2905, 2874, 2043, 1960 ( $\nu_{\text{CO}}$ ), 1612, 1479, 1274, 1151, 1034, 829, 770, 640.

MALDI-MS:  $m/z$  calcd for  $[\text{C}_{30}\text{H}_{49}\text{Ir}_2\text{N}_2\text{O}_2\text{P}_2]^+$  915.25, found 915.21.

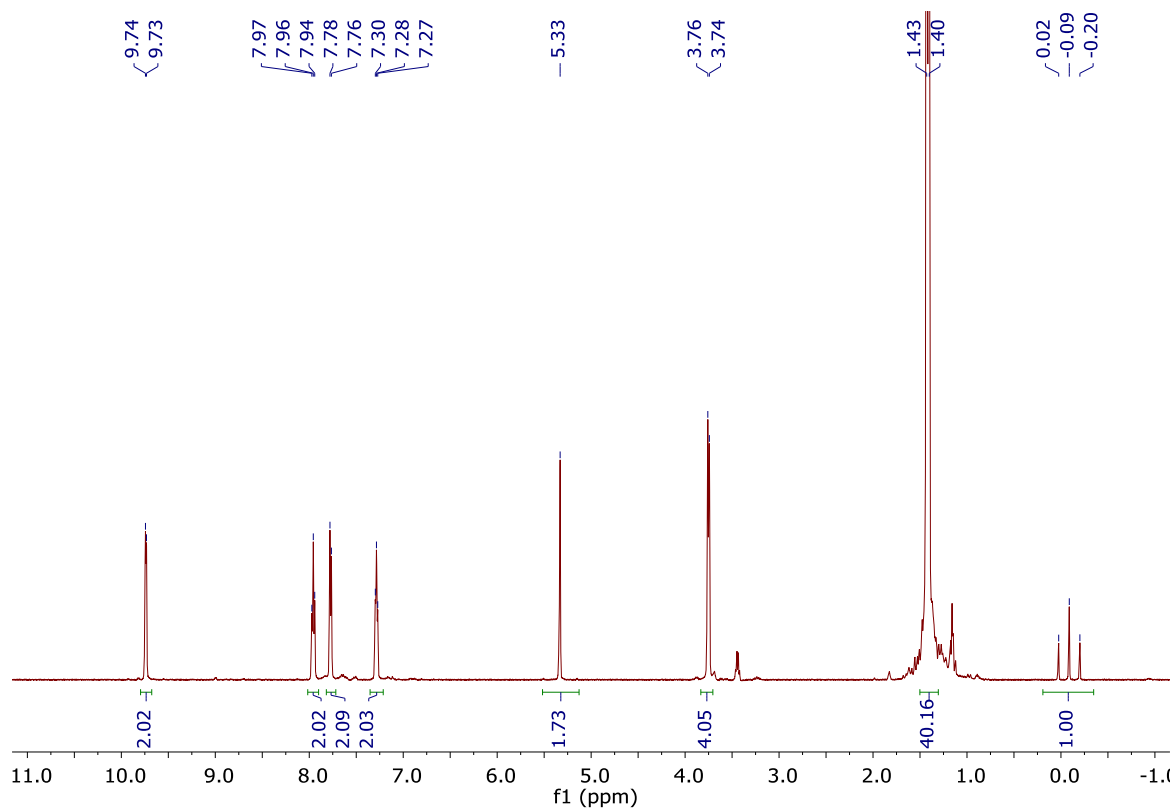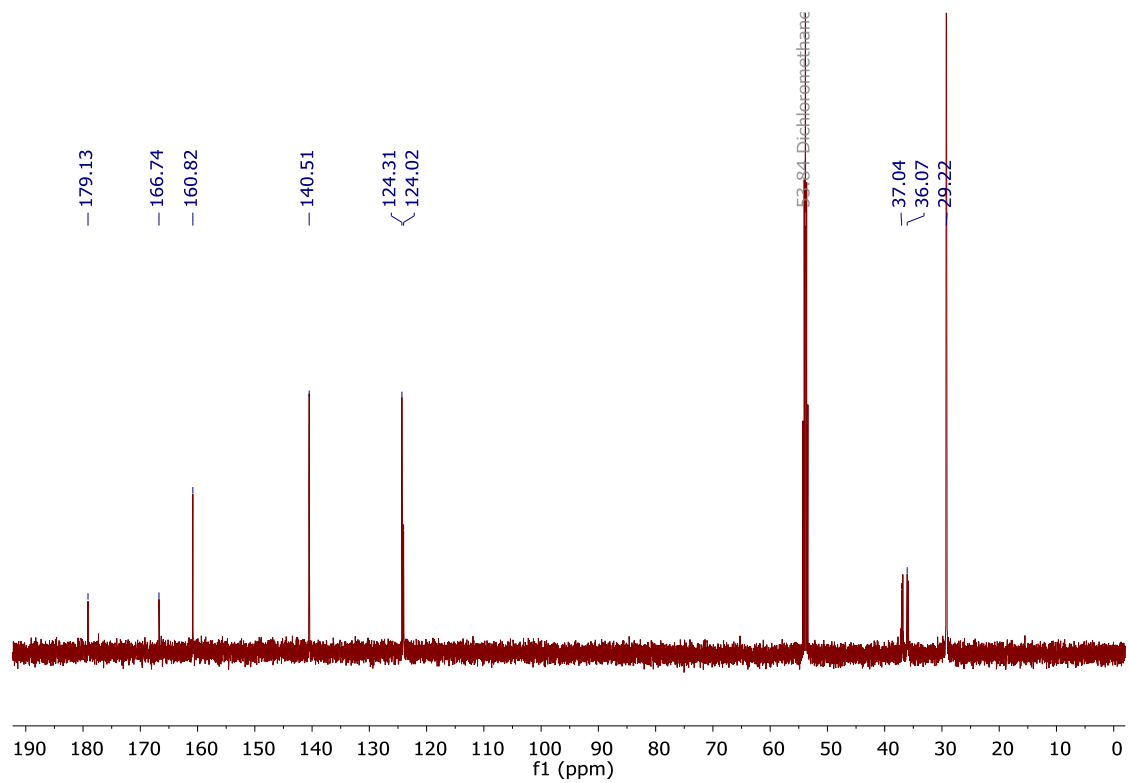

Figure S1.  $^1\text{H}$  and  $^{13}\text{C}\{^1\text{H}\}$  NMR spectra of **11-CO** in  $\text{CD}_2\text{Cl}_2$ .

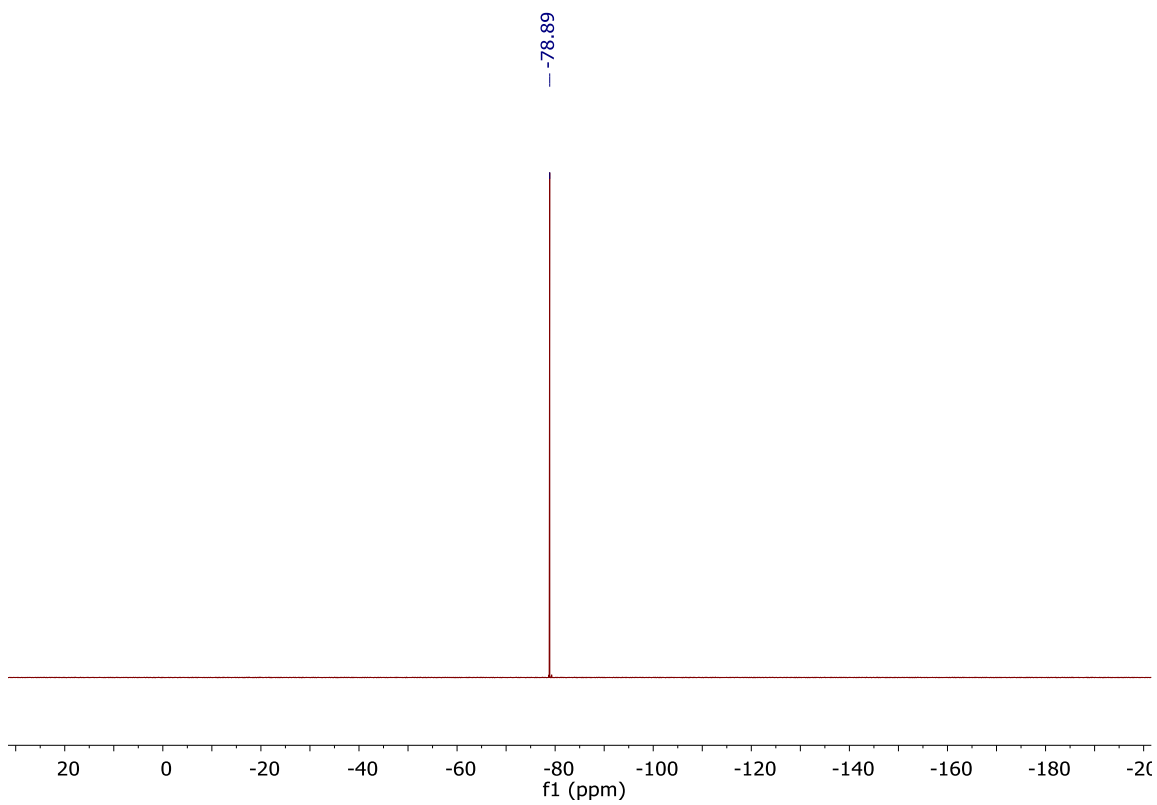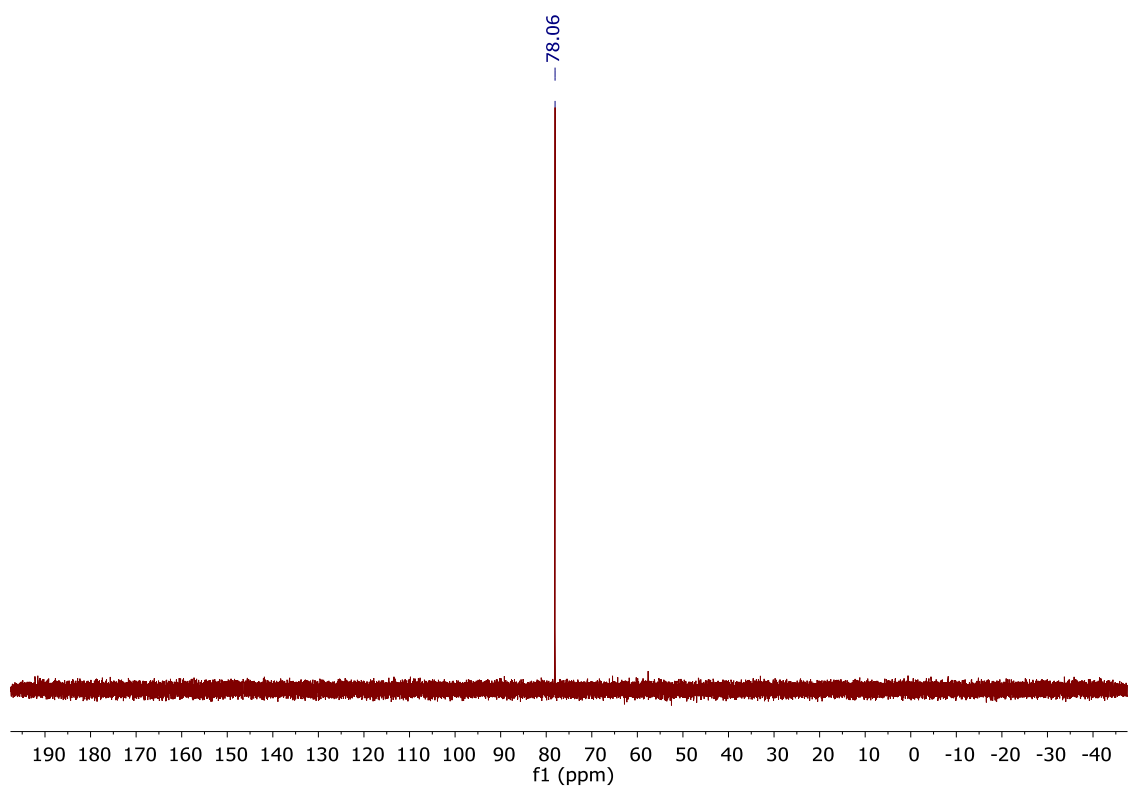

**Figure S2.**  $^{19}\text{F}$  (top) and  $^{31}\text{P}\{^1\text{H}\}$  (bottom) NMR spectra of **11-CO** in  $\text{CD}_2\text{Cl}_2$ .

**Complex 5:** In a N<sub>2</sub>-filled glovebox, a suspension of **4** (200 mg, 0.27 mmol) in toluene (5 ml) was added a solution of NaHBEt<sub>3</sub> (1.0 M in toluene; 0.54 mL; 0.54 mmol) dropwise at room temperature. The white suspension slowly turned into a transparent orange-red solution within 1 hour. The reaction was stirring at room temperature for 18 hours giving a dark orange solution. The reaction mixture volume was partially reduced under vacuum and filtered. The resulting filtrate was concentrated under vacuum, layered with pentane in the glovebox to obtain turmeric yellow crystalline solid in 2 days. They were filtered, washed with pentane, and dried in vacuum. <sup>1</sup>H NMR (600 MHz, C<sub>6</sub>D<sub>6</sub>): δ -11.6 (s, 1H, RuH), -7.5 (dd, <sup>2</sup>J<sub>HH</sub> = 18 Hz, 1H, RuH), δ 1.72 (s, 3H), δ 1.86-2.35 (m, 7H), δ 2.97 (d, 2H), δ 6.93-7.12 (m, 12H), δ 7.17-7.32 (m, 4H), δ 7.67 (t, *J* = 7.67 Hz, 8H). <sup>31</sup>P{<sup>1</sup>H} NMR (243 MHz, C<sub>6</sub>D<sub>6</sub>): δ 78.75 (s), δ 50.94 (s). MALDI-MS: *m/z* calcd for 669.13, found 669.25.

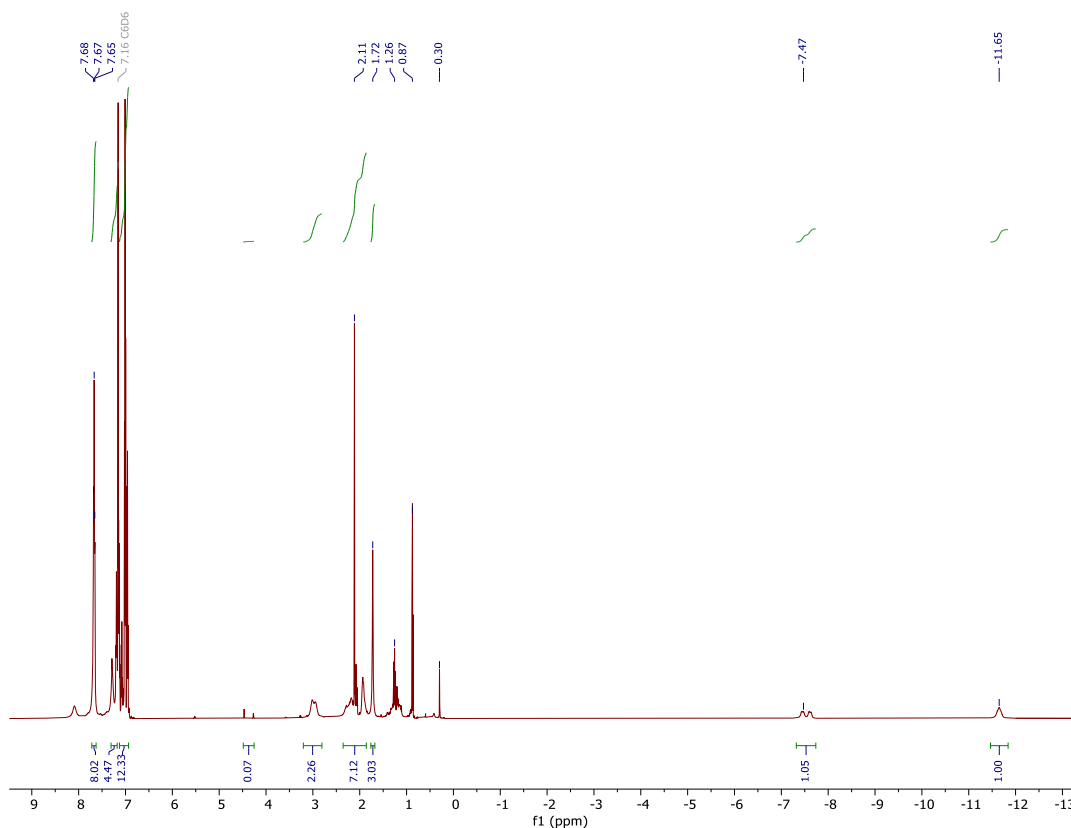

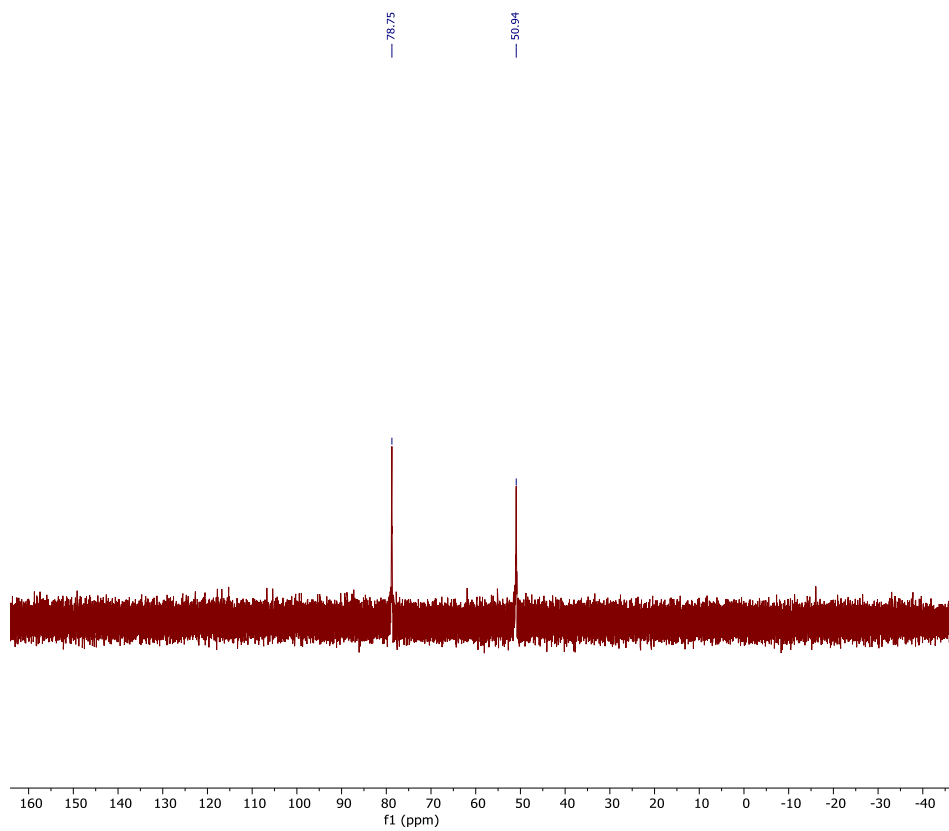

**Figure S3.**  $^1\text{H}$  and  $^{31}\text{P}\{^1\text{H}\}$  NMR spectra of **5** in  $\text{C}_6\text{D}_6$ .

### 3. Ambient Pressure Kinetics of All Screened Catalysts

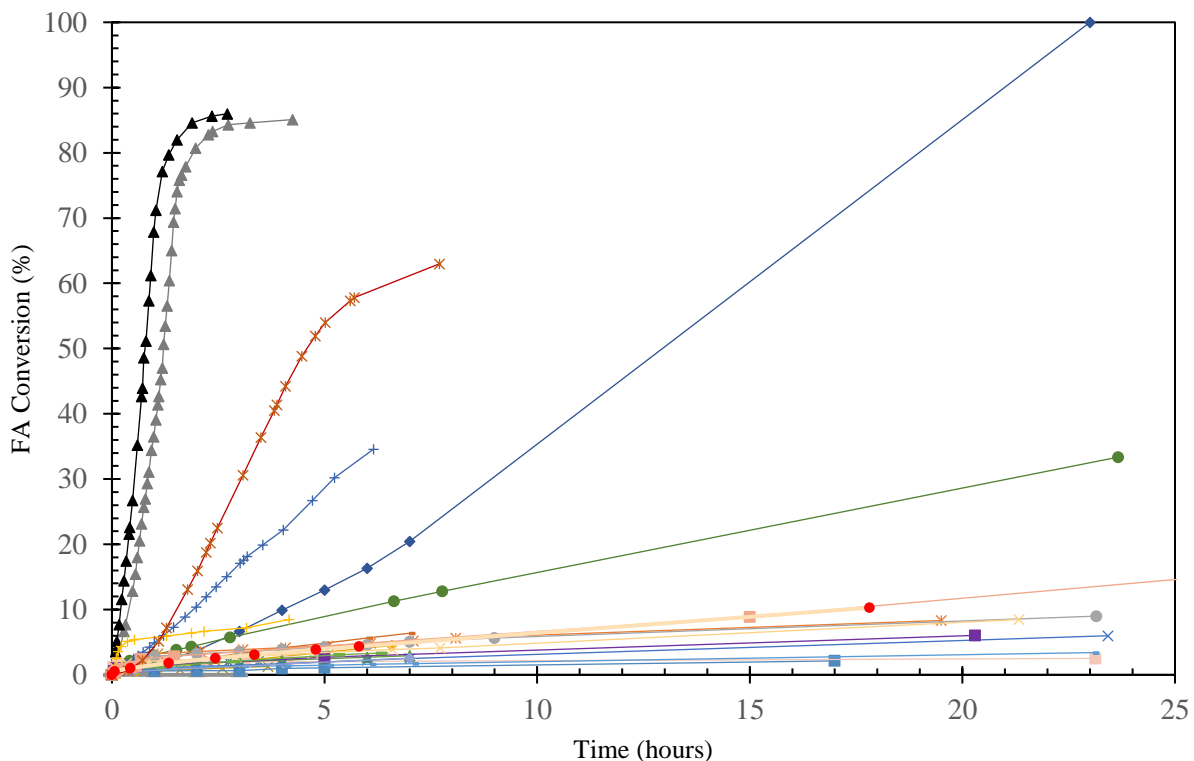

**Figure S4a.** Gas evolution of formic acid dehydrogenation by complexes **1-21** at ambient pressure over time (0 - 25 hours): complex **1** – lavender crosses; complex **1** w/ <sup>t</sup>BuOK – purple squares; complex **2** – orange asterisks; complex **2** w/<sup>t</sup>BuOK – grey circles; complex **3** – yellow plusses; complex **4** – blue squares; complex **4** w/<sup>t</sup>BuOK – peach squares; complex **5** – green triangles; complex **6** – cream crosses; complex **7** – red asterisks; complex **8** – red circles; complex **9-CO** – blue plusses; complex **10** – orange hyphens; complex **11** – black triangles;-; complex **12** – navy diamonds; complex **13** – grey hyphens; complex **14** – yellow crosses; complex **15** – blue asterisks; complex **16** – lavender diamonds; complex **17** – pink squares; complex **18** – green hyphens; complex **19** – grey triangles; complex **20** – green circles; complex **21** – yellow diamonds



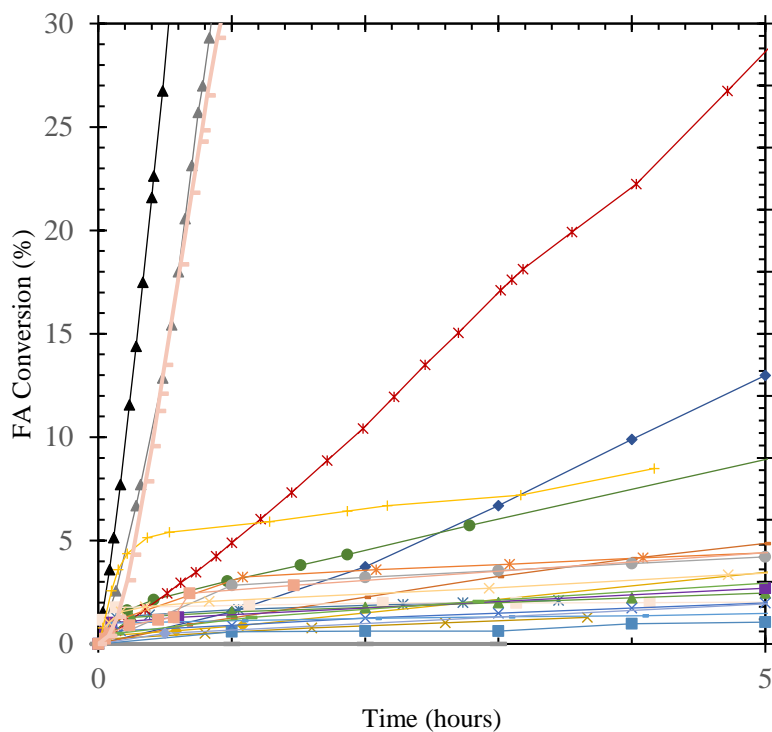

**Figure S4b.** Gas evolution of formic acid dehydrogenation by complexes **1-20** at ambient pressure over time (0 - 5 hours): complex **1** – lavender crosses; complex **1** w/ <sup>1</sup>BuOK – purple squares; complex **2** – orange asterisks; complex **2** w/ <sup>1</sup>BuOK – grey circles; complex **3** – yellow plusses; complex **4** – blue squares; complex **4** w/ <sup>1</sup>BuOK – peach squares; complex **5** – green triangles; complex **6** – cream crosses; complex **7** – red asterisks; complex **8** – red circles; complex **9-CO** – blue plusses; complex **10** – orange hyphens; complex **11** – black triangles;–; complex **12** – navy diamonds; complex **13** – grey hyphens; complex **14** – yellow crosses; complex **15** – blue asterisks; complex **16** – lavender diamonds; complex **17** – pink squares; complex **18** – green hyphens; complex **19** – grey triangles; complex **20** – green circles; complex **21** – yellow diamonds

### Ambient versus Self-Pressurized Kinetics

All 20 screened catalysts kinetic profile under ambient pressure versus self-pressurized by evolved gases.

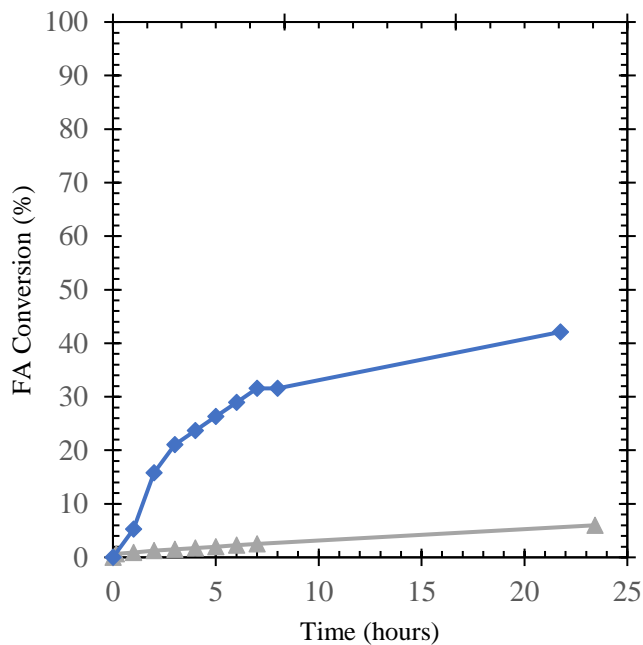

**Figure S5.** Gas evolution of formic acid dehydrogenation by complex **1** with pre-activation over time at ambient pressure condition (opened system) – grey triangles; at self-pressurized condition (closed system) – blue diamonds.

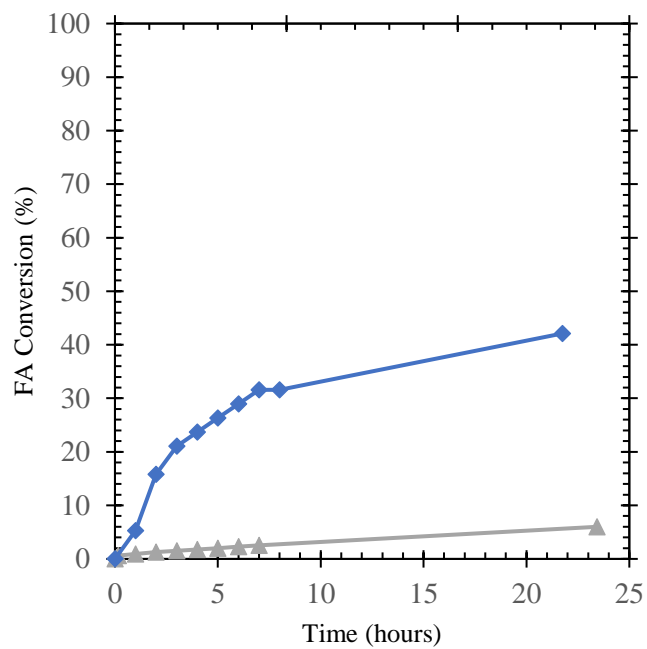

**Figure S6.** Gas evolution of formic acid dehydrogenation by complex **1** without pre-activation over time at ambient pressure condition (opened system) – grey triangles; at self-pressurized condition (closed system) – blue diamonds.

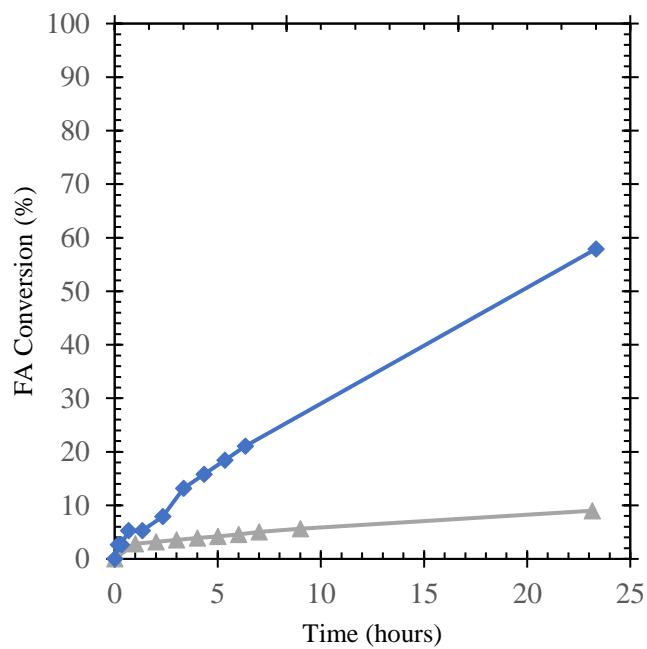

**Figure S7.** Gas evolution of formic acid dehydrogenation by complex **2** with pre-activation over time at ambient pressure condition (opened system) – grey triangles; at self-pressurized condition (closed system) – blue diamonds.

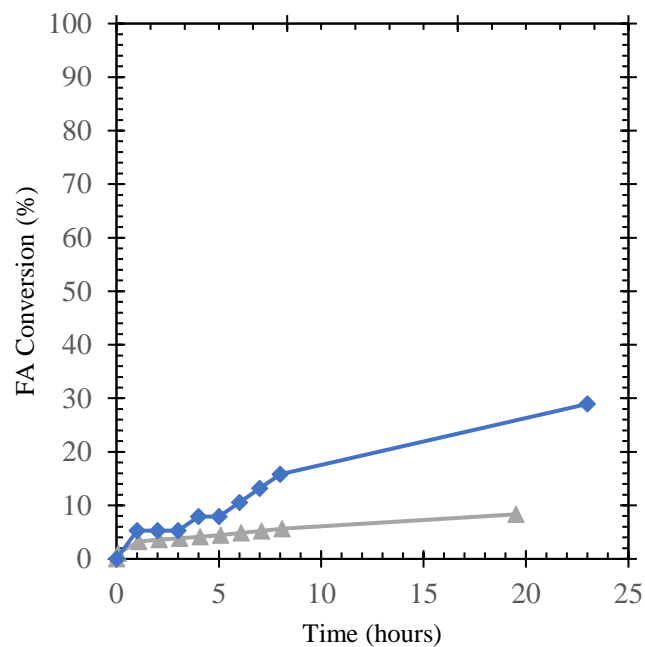

**Figure S8.** Gas evolution of formic acid dehydrogenation by complex **2** without pre-activation over time at ambient pressure condition (opened system) – grey triangles; at self-pressurized condition (closed system) – blue diamonds.

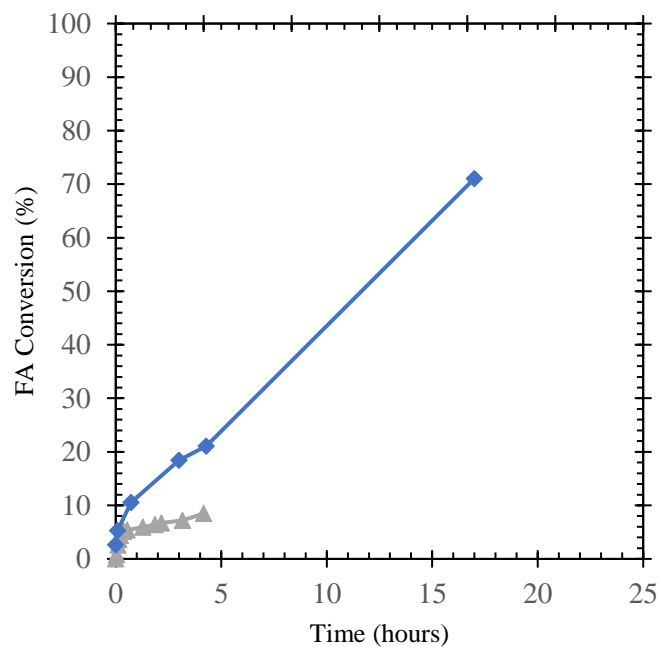

**Figure S9.** Gas evolution of formic acid dehydrogenation by complex **3** over time at ambient pressure condition (opened system) – grey triangles; at self-pressurized condition (closed system) – blue diamonds.

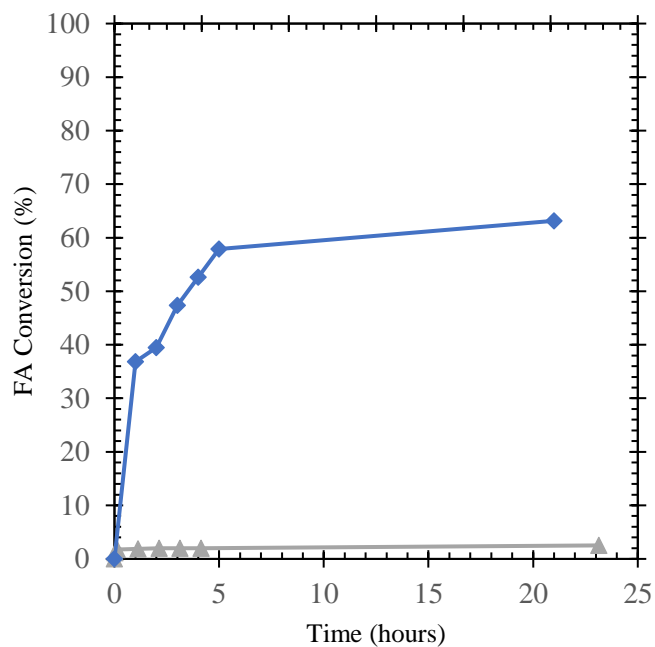

**Figure S10.** Gas evolution of formic acid dehydrogenation by complex **4** with pre-activation over time at ambient pressure condition (opened system) – grey triangles; at self-pressurized condition (closed system) – blue diamonds.

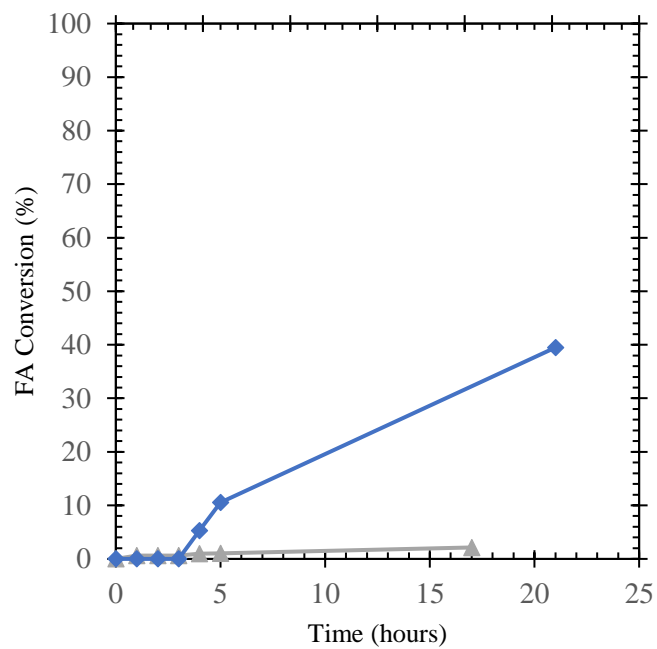

**Figure S11.** Gas evolution of formic acid dehydrogenation by complex **4** without pre-activation over time at ambient pressure condition (opened system) – grey triangles; at self-pressurized condition (closed system) – blue diamonds.



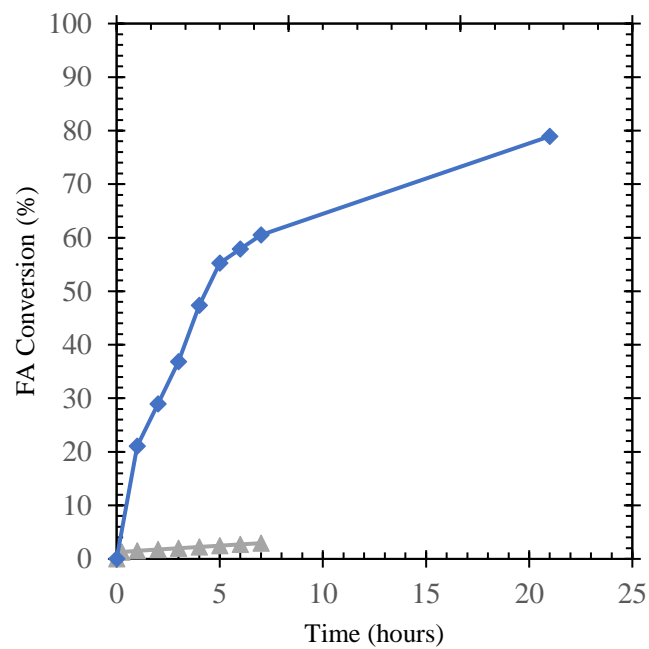

**Figure S12.** Gas evolution of formic acid dehydrogenation by complex **5** over time at ambient pressure condition (opened system) – grey triangles; at self-pressurized condition (closed system) – blue diamonds.

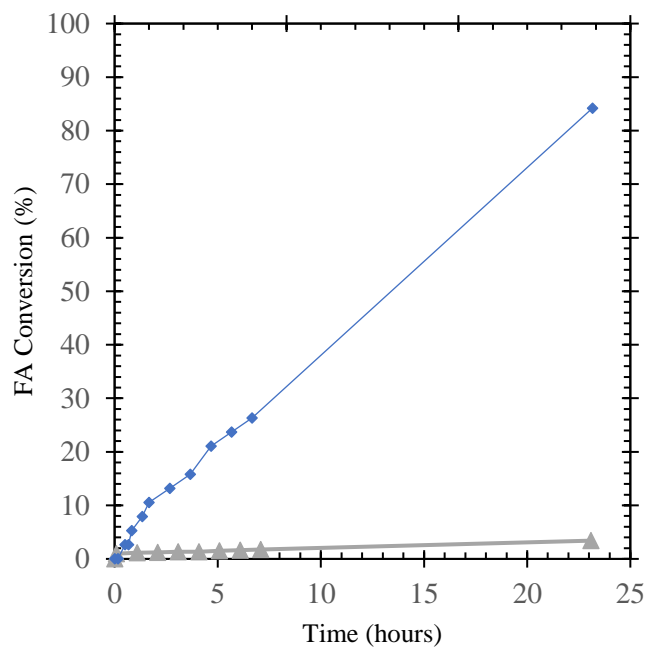

**Figure S13.** Gas evolution of formic acid dehydrogenation by complex **6** with pre-activation over time at ambient pressure condition (opened system) – grey triangles; at self-pressurized condition (closed system) – blue diamonds. No activity at ambient pressure over 3 hours.

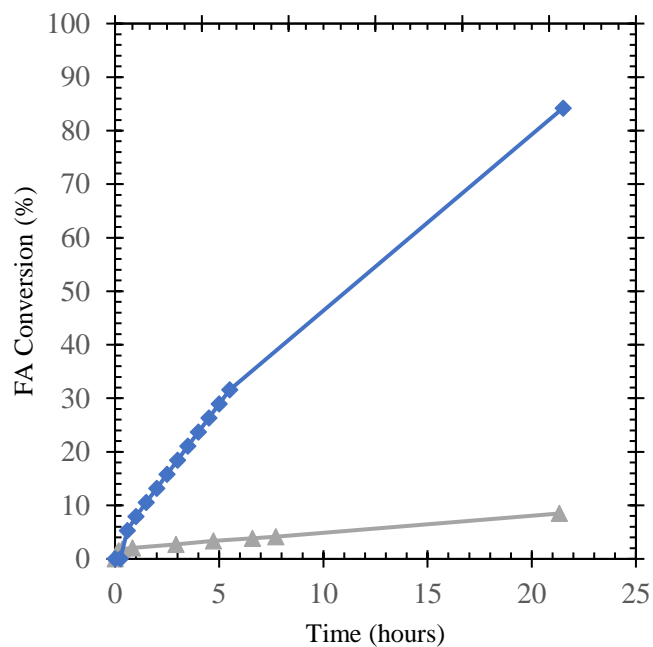

**Figure S14.** Gas evolution of formic acid dehydrogenation by complex **6** without pre-activation over time at ambient pressure condition (opened system) – grey triangles; at self-pressurized condition (closed system) – blue diamonds.

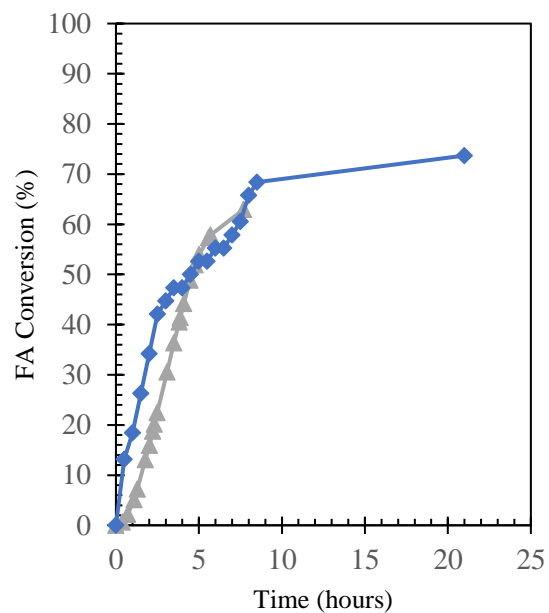

**Figure S15.** Gas evolution of formic acid dehydrogenation by complex **7** over time at ambient pressure condition (opened system) – grey triangles; at self-pressurized condition (closed system) – blue diamonds.

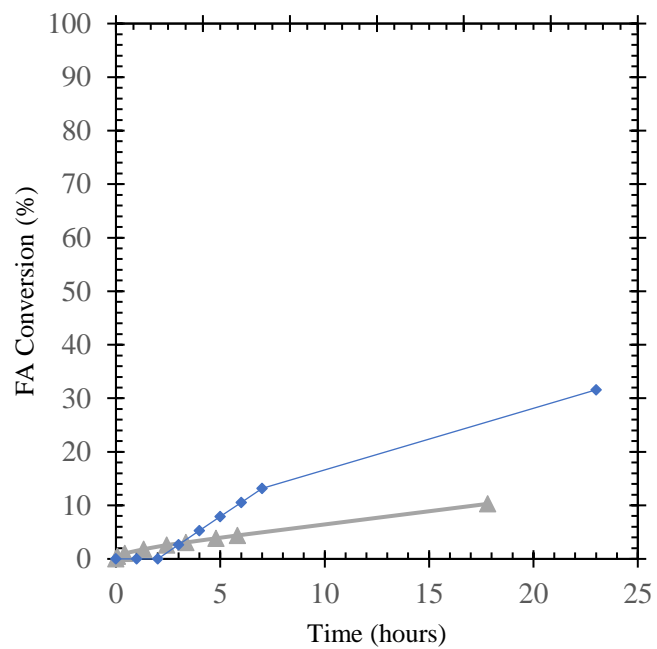

**Figure S16.** Gas evolution of formic acid dehydrogenation by complex **8** over time at ambient pressure condition (opened system) – grey triangles; at self-pressurized condition (closed system) – blue diamonds.

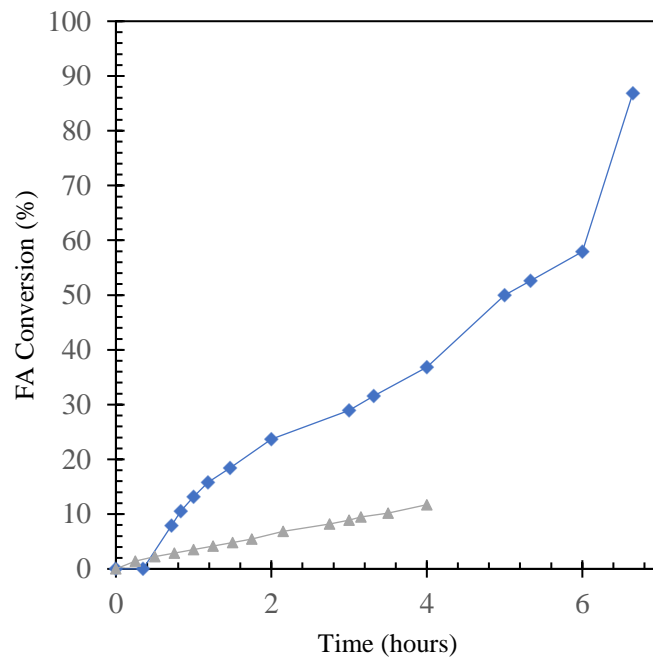

**Figure S17.** Gas evolution of formic acid dehydrogenation by complex **9** over time at ambient pressure condition (opened system) – grey triangles; at self-pressurized condition (closed system) – blue diamonds.

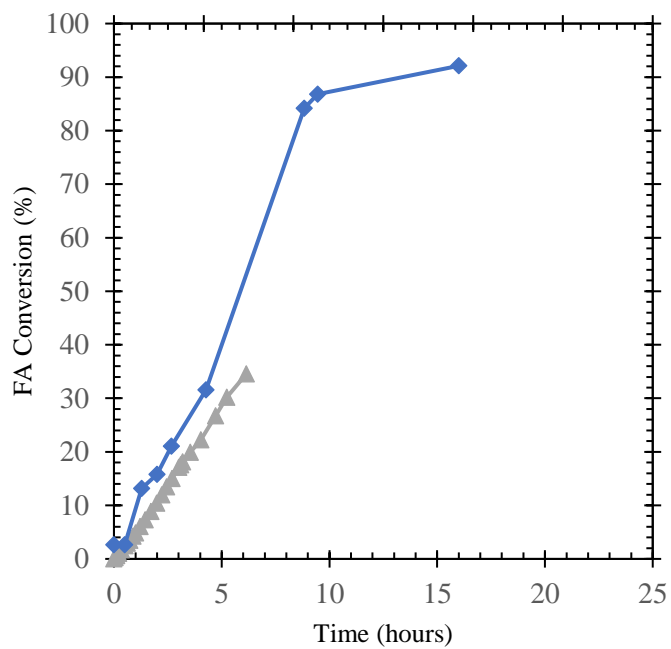

**Figure S18.** Gas evolution of formic acid dehydrogenation by complex **9-CO** over time at ambient pressure condition (opened system) – grey triangles; at self-pressurized condition (closed system) – blue diamonds.

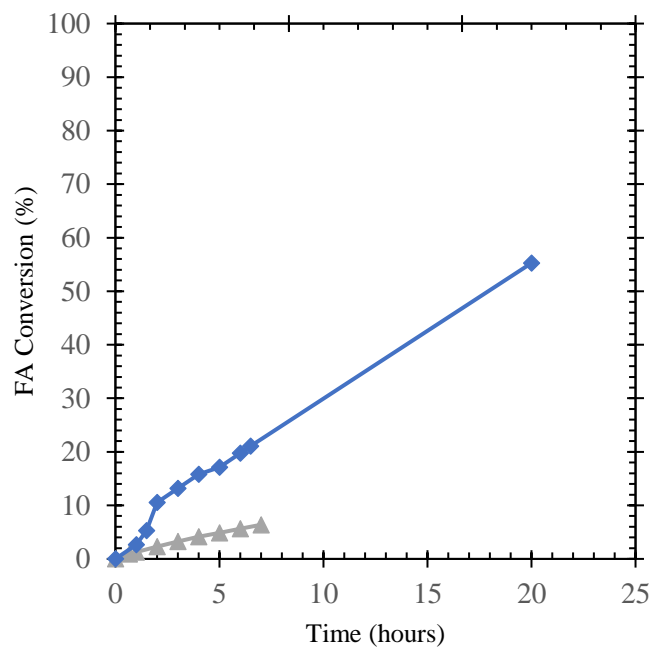

**Figure S19.** Gas evolution of formic acid dehydrogenation by complex **10** over time at ambient pressure condition (opened system) – grey triangles; at self-pressurized condition (closed system) – blue diamonds.



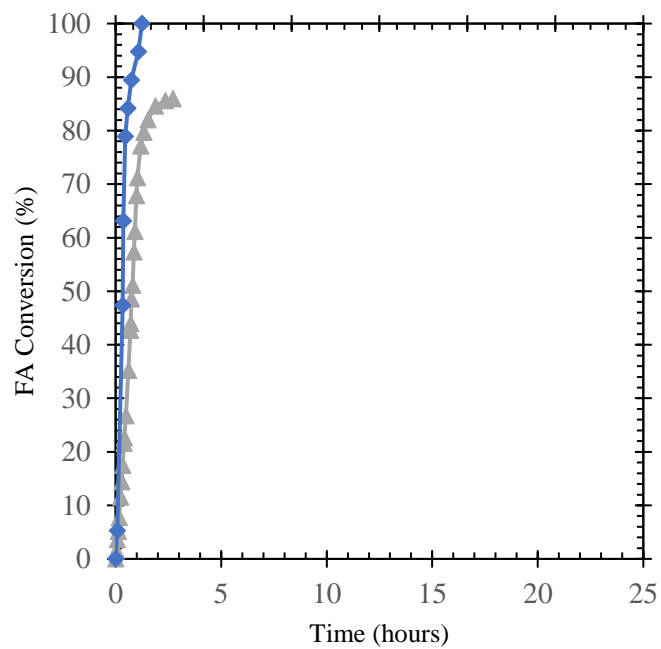

**Figure S20.** Gas evolution of formic acid dehydrogenation by complex **11** over time at ambient pressure condition (opened system) – grey triangles; at self-pressurized condition (closed system) – blue diamonds.

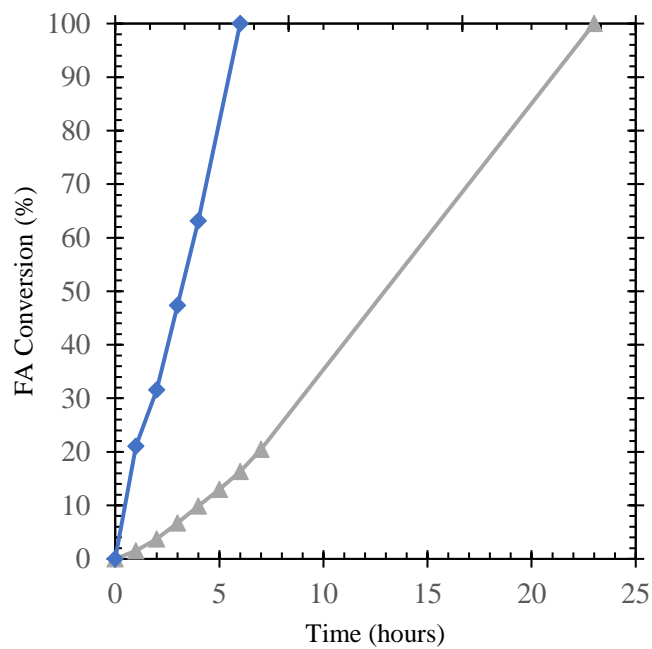

**Figure S21.** Gas evolution of formic acid dehydrogenation by complex **12** over time at ambient pressure condition (opened system) – grey triangles; at self-pressurized condition (closed system) – blue diamonds.

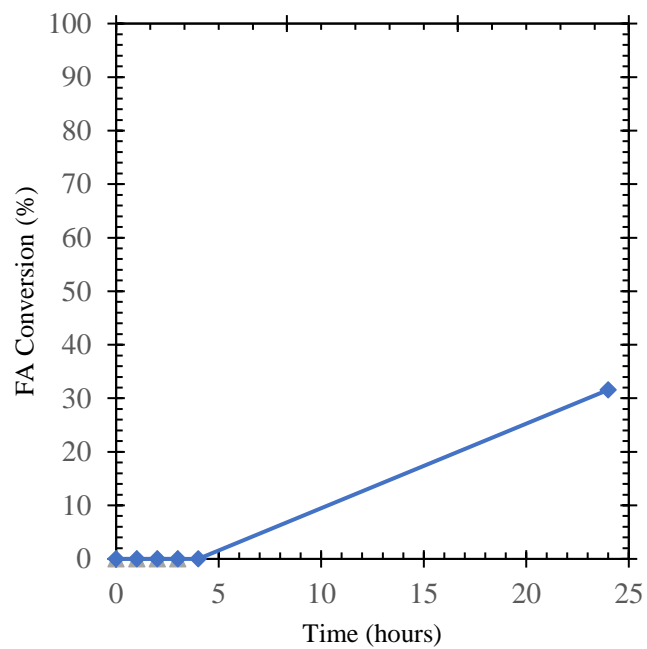

**Figure S22.** Gas evolution of formic acid dehydrogenation by complex **13** over time at ambient pressure condition (opened system) – grey triangles; at self-pressurized condition (closed system) – blue diamonds.

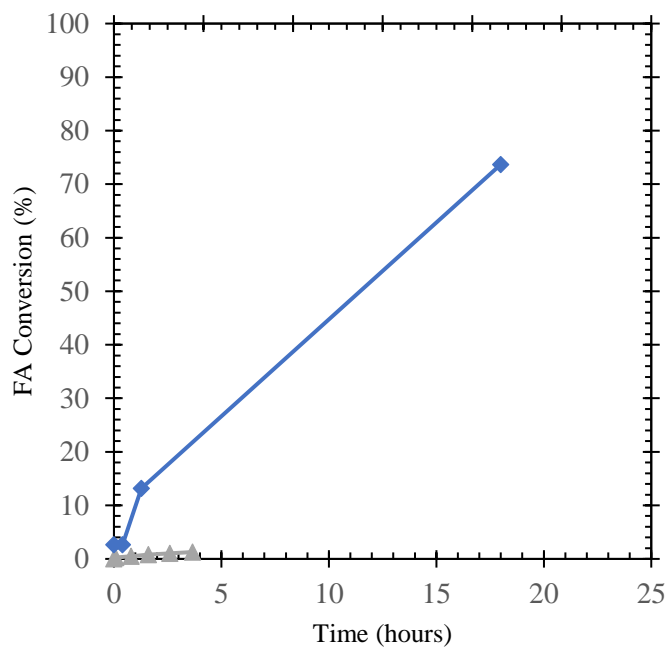

**Figure S23.** Gas evolution of formic acid dehydrogenation by complex **14** over time at ambient pressure condition (opened system) – grey triangles; at self-pressurized condition (closed system) – blue diamonds.

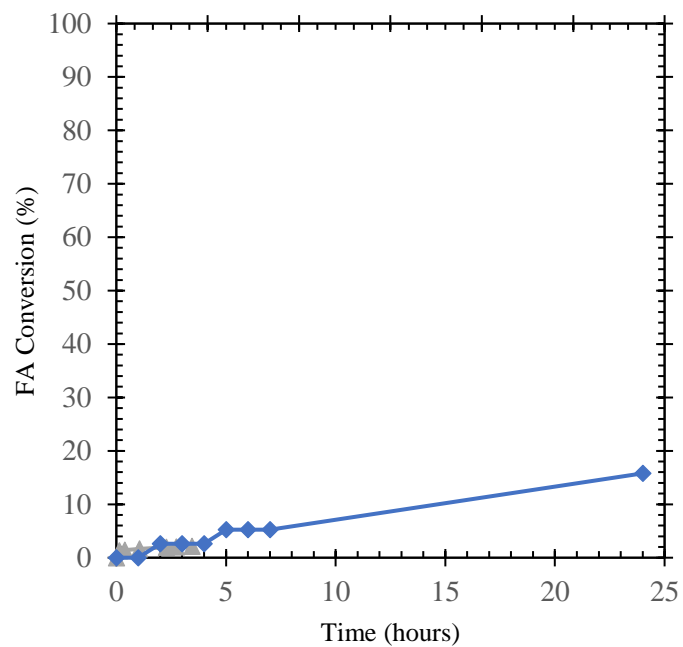

**Figure S24.** Gas evolution of formic acid dehydrogenation by complex **15** over time at ambient pressure condition (opened system) – grey triangles; at self-pressurized condition (closed system) – blue diamonds.

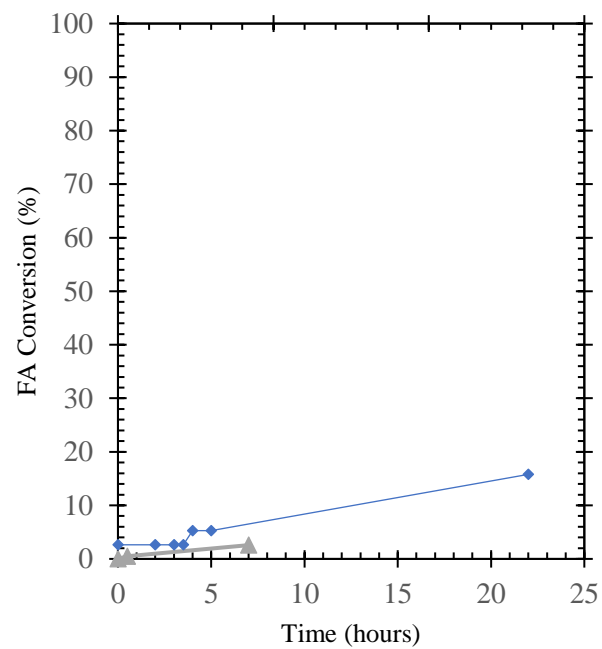

**Figure S25.** Gas evolution of formic acid dehydrogenation by complex **16** over time at ambient pressure condition (opened system) – grey triangles; at self-pressurized condition (closed system) – blue diamonds.

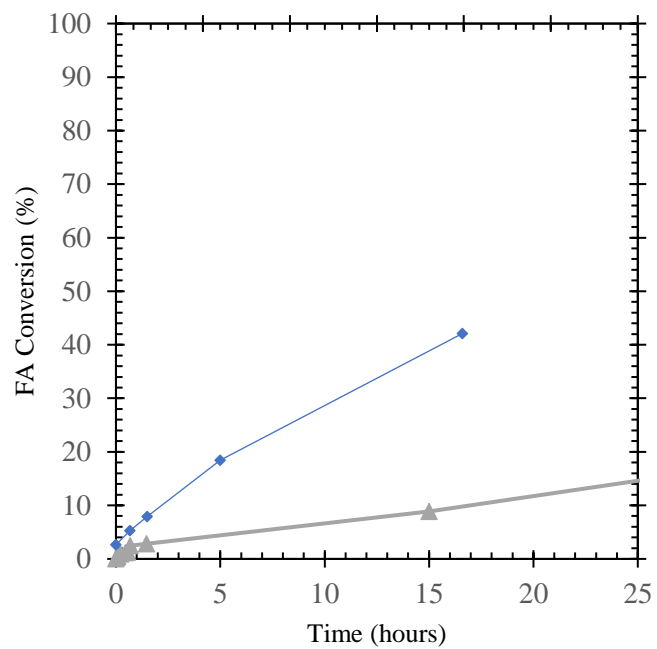

**Figure S26.** Gas evolution of formic acid dehydrogenation by complex **17** over time at ambient pressure condition (opened system) – grey triangles; at self-pressurized condition (closed system) – blue diamonds.

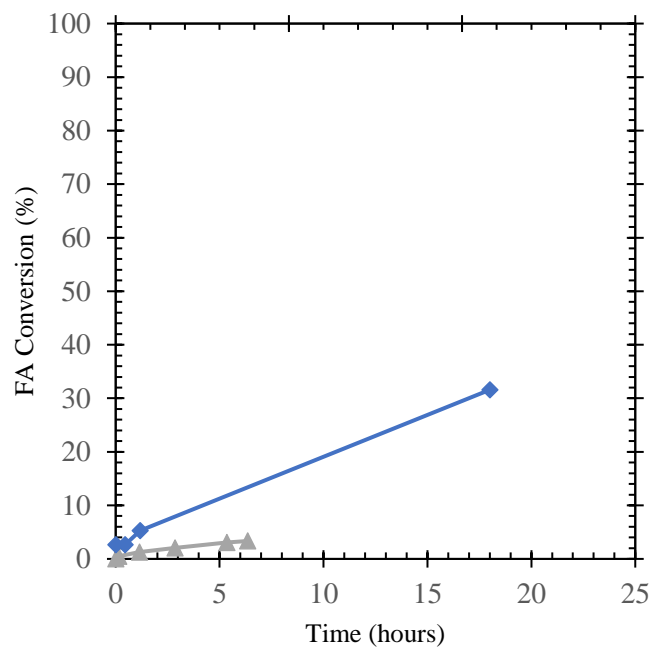

**Figure S27.** Gas evolution of formic acid dehydrogenation by complex **18** over time at ambient pressure condition (opened system) – grey triangles; at self-pressurized condition (closed system) – blue diamonds.



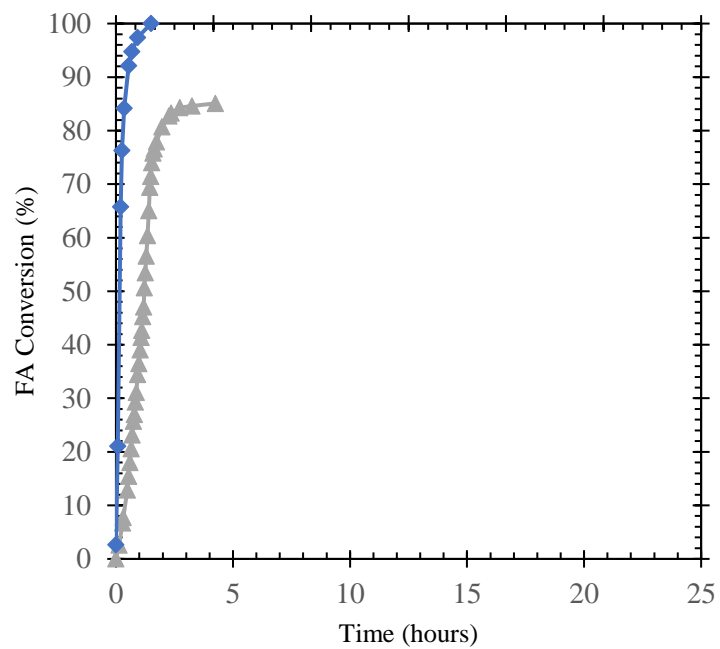

**Figure S28.** Gas evolution of formic acid dehydrogenation by complex **19** over time at ambient pressure condition (opened system) – grey triangles; at self-pressurized condition (closed system) – blue diamonds.

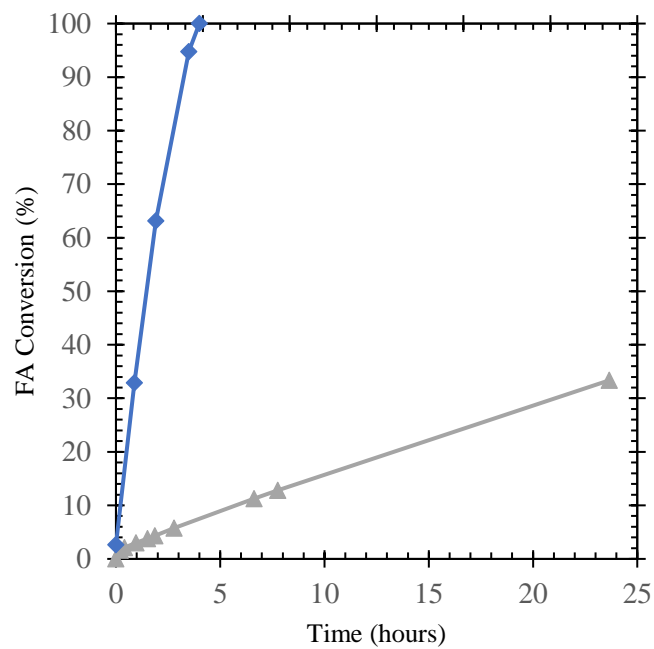

**Figure S29.** Gas evolution of formic acid dehydrogenation by complex **20** over time at ambient pressure condition (opened system) – grey triangles; at self-pressurized condition (closed system) – blue diamonds.

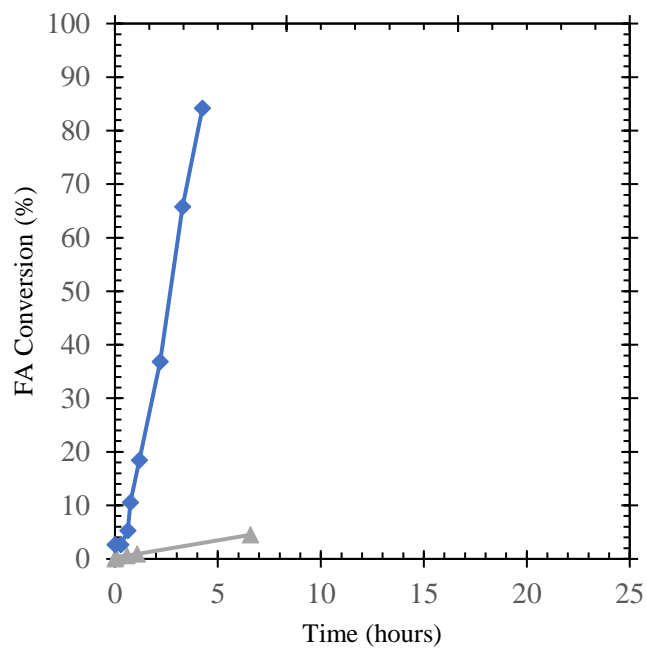

**Figure S30.** Gas evolution of formic acid dehydrogenation by complex **21** with pre-activation over time at ambient pressure condition (opened system) – grey triangles; at self-pressurized condition (closed system) – blue diamonds.

#### 4. Effect of Various CO Pressures on Reaction Kinetics of **9**, **9-CO**, and **10**

A.

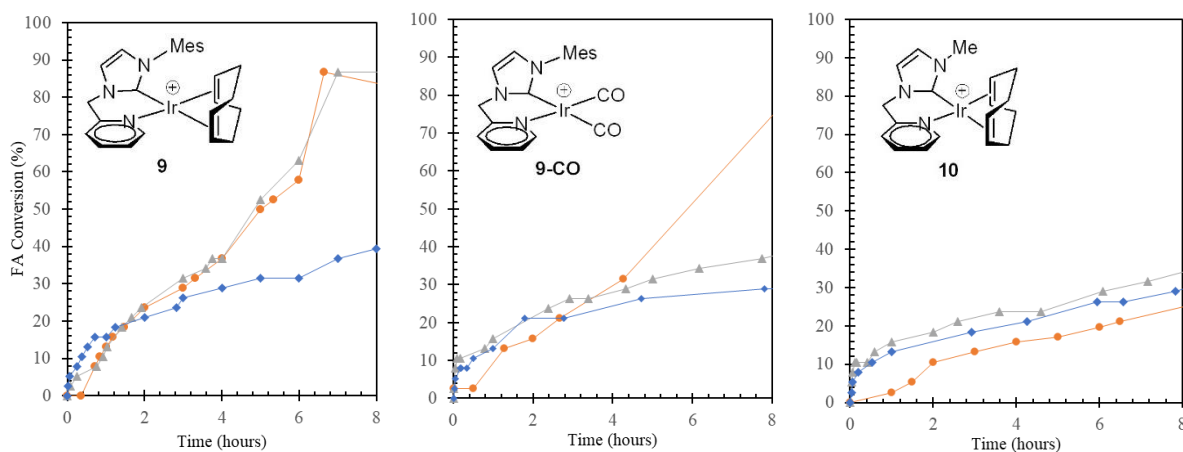

B.

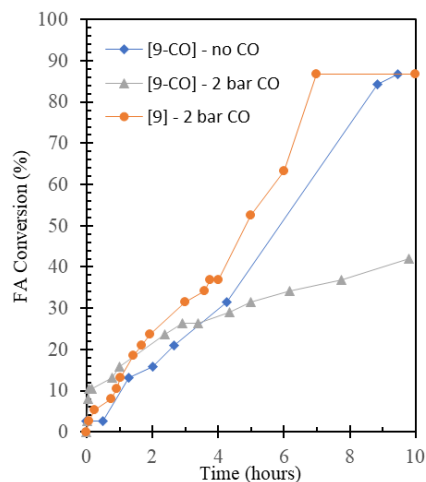

**Figure S31.** A. Gas evolution of formic acid dehydrogenation by complex **9**, **9-CO**, and **10** over time pretreated with 0 bar CO – orange circles; pretreated with 2 bar CO – grey triangles; pretreated with 8 bar CO – blue diamonds. B. Cross-comparison CO initiation between **9** and **9-CO** showed that after **9** was synthesized in-situ (initiation via catalyst carbonylation), excess CO gas becomes inhibitory to reaction kinetics.

## X-ray Crystallography Data

### Crystal structure of 11-CO

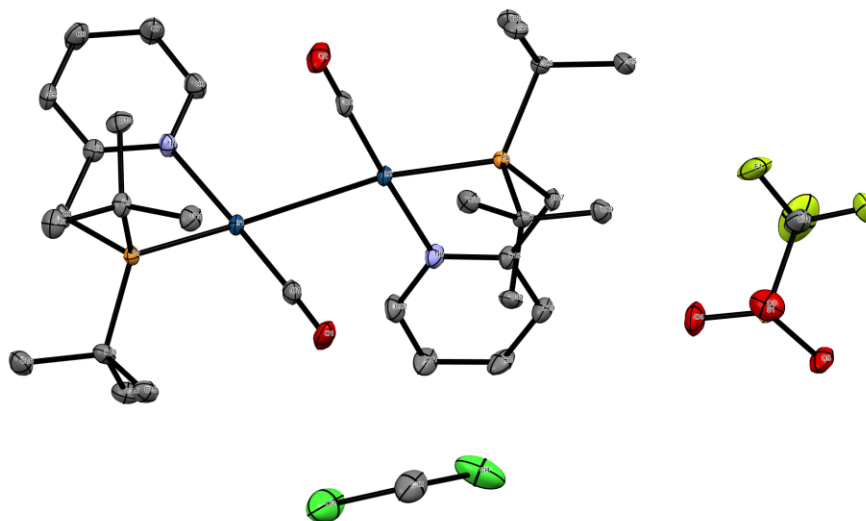

**Figure S32.** Molecular structure of **11-CO** shown with 50% probability ellipsoids. Hydrogen atoms are omitted for clarity.

A specimen of  $C_{32}H_{51}Cl_2F_3Ir_2N_2O_5P_2S$ , approximate dimensions 0.030 mm x 0.060 mm x 0.140 mm, was used for the X-ray crystallographic analysis. The X-ray intensity data were measured on a Bruker APEX DUO system equipped with a fine-focus tube ( $MoK\alpha$ ,  $\lambda = 0.71073 \text{ \AA}$ ) and a TRIUMPH curved-crystal monochromator.

The total exposure time was 3.50 hours. The frames were integrated with the Bruker SAINT software package using a SAINT V8.40A (Bruker AXS, 2013) algorithm. The integration of the data using a monoclinic unit cell yielded a total of 100068 reflections to a maximum  $\theta$  angle of  $30.56^\circ$  ( $0.70 \text{ \AA}$  resolution), of which 12322 were independent (average redundancy 8.121, completeness = 99.4%,  $R_{int} = 7.06\%$ ,  $R_{sig} = 4.33\%$ ) and 9871 (80.11%) were greater than  $2\sigma(F^2)$ . The final cell constants of  $a = 14.7885(16) \text{ \AA}$ ,  $b = 17.1958(19) \text{ \AA}$ ,  $c = 15.9928(18) \text{ \AA}$ ,  $\beta = 96.222(2)^\circ$ , volume =  $4043.0(8) \text{ \AA}^3$ , are based upon the refinement of the XYZ-centroids of 9022 reflections above  $20 \sigma(I)$  with  $5.121^\circ < 2\theta < 60.94^\circ$ . Data were corrected for absorption effects using the multi-scan method (SADABS). The ratio of minimum to maximum apparent transmission was 0.762. The calculated minimum and maximum transmission coefficients (based on crystal size) are 0.4450 and 0.8200.

The structure was solved and refined using the Bruker SHELXTL Software Package, using the space group P 1 21/c 1, with Z = 4 for the formula unit, C<sub>32</sub>H<sub>51</sub>Cl<sub>2</sub>F<sub>3</sub>Ir<sub>2</sub>N<sub>2</sub>O<sub>5</sub>P<sub>2</sub>S. The final anisotropic full-matrix least-squares refinement on F<sup>2</sup> with 458 variables converged at R1 = 2.84%, for the observed data and wR2 = 5.38% for all data. The goodness-of-fit was 1.027. The largest peak in the final difference electron density synthesis was 1.414 e-/Å<sup>3</sup> and the largest hole was -0.995 e-/Å<sup>3</sup> with an RMS deviation of 0.169 e-/Å<sup>3</sup>. On the basis of the final model, the calculated density was 1.889 g/cm<sup>3</sup> and F(000), 2232 e-.

**Table S1.** Sample and crystal data for **11-CO**.

|                        |                                                                                                                               |                |
|------------------------|-------------------------------------------------------------------------------------------------------------------------------|----------------|
| Identification code    | Ir2H                                                                                                                          |                |
| Chemical formula       | C <sub>32</sub> H <sub>51</sub> Cl <sub>2</sub> F <sub>3</sub> Ir <sub>2</sub> N <sub>2</sub> O <sub>5</sub> P <sub>2</sub> S |                |
| Formula weight         | 1150.05 g/mol                                                                                                                 |                |
| Temperature            | 100(2) K                                                                                                                      |                |
| Wavelength             | 0.71073 Å                                                                                                                     |                |
| Crystal size           | 0.030 x 0.060 x 0.140 mm                                                                                                      |                |
| Crystal system         | monoclinic                                                                                                                    |                |
| Space group            | P 1 21/c 1                                                                                                                    |                |
| Unit cell dimensions   | a = 14.7885(16) Å                                                                                                             | α = 90°        |
|                        | b = 17.1958(19) Å                                                                                                             | β = 96.222(2)° |
|                        | c = 15.9928(18) Å                                                                                                             | γ = 90°        |
| Volume                 | 4043.0(8) Å <sup>3</sup>                                                                                                      |                |
| Z                      | 4                                                                                                                             |                |
| Density (calculated)   | 1.889 g/cm <sup>3</sup>                                                                                                       |                |
| Absorption coefficient | 6.892 mm <sup>-1</sup>                                                                                                        |                |
| F(000)                 | 2232                                                                                                                          |                |

**Table S2.** Data collection and structure refinement for **11-CO**.

|                                 |                                          |
|---------------------------------|------------------------------------------|
| Diffractometer                  | Bruker APEX DUO                          |
| Radiation source                | fine-focus tube (MoKα, λ =<br>0.71073 Å) |
| Theta range for data collection | 1.74 to 30.56°                           |
| Index ranges                    | -20<=h<=21, -24<=k<=24, -<br>22<=l<=22   |

|                                     |                                                                           |                           |
|-------------------------------------|---------------------------------------------------------------------------|---------------------------|
| Reflections collected               | 100068                                                                    |                           |
| Independent reflections             | 12322 [R(int) = 0.0706]                                                   |                           |
| Coverage of independent reflections | 99.4%                                                                     |                           |
| Absorption correction               | multi-scan                                                                |                           |
| Max. and min. transmission          | 0.8200 and 0.4450                                                         |                           |
| Structure solution technique        | direct methods                                                            |                           |
| Structure solution program          | SHELXTL XT 2014/5 (Bruker<br>AXS, 2014)                                   |                           |
| Refinement method                   | Full-matrix least-squares on F <sup>2</sup>                               |                           |
| Refinement program                  | SHELXTL XL 2018/3 (Bruker<br>AXS, 2018)                                   |                           |
| Function minimized                  | $\Sigma w(F_o^2 - F_c^2)^2$                                               |                           |
| Data / restraints / parameters      | 12322 / 0 / 458                                                           |                           |
| Goodness-of-fit on F <sup>2</sup>   | 1.027                                                                     |                           |
| $\Delta/\sigma_{\max}$              | 0.003                                                                     |                           |
| Final R indices                     | 9871 data; I>2 $\sigma$ (I)                                               | R1 = 0.0284, wR2 = 0.0494 |
|                                     | all data                                                                  | R1 = 0.0463, wR2 = 0.0538 |
| Weighting scheme                    | $w=1/[\sigma^2(F_o^2)+(0.0143P)^2+7.3865P]$<br>where $P=(F_o^2+2F_c^2)/3$ |                           |
| Largest diff. peak and hole         | 1.414 and -0.995 eÅ <sup>-3</sup>                                         |                           |
| R.M.S. deviation from mean          | 0.169 eÅ <sup>-3</sup>                                                    |                           |

**Table S3.** Atomic coordinates and equivalent isotropic atomic displacement parameters (Å<sup>2</sup>) for **11-CO**.

|    | <b>x/a</b> | <b>y/b</b>  |
|----|------------|-------------|
| C1 | 0.7874(2)  | 0.1316(2)   |
| C2 | 0.6307(2)  | 0.1518(2)   |
| C3 | 0.8351(2)  | 0.88721(19) |
| C4 | 0.8114(2)  | 0.91184(19) |
| C5 | 0.8064(2)  | 0.8582(2)   |
| C6 | 0.7846(3)  | 0.8816(2)   |
| C7 | 0.7681(3)  | 0.9594(2)   |
| C8 | 0.7742(3)  | 0.0111(2)   |
| C9 | 0.6704(2)  | 0.9262(2)   |

---

|     |             |             |
|-----|-------------|-------------|
| C10 | 0.6232(2)   | 0.9109(2)   |
| C11 | 0.6202(2)   | 0.9941(2)   |
| C12 | 0.6614(3)   | 0.8530(2)   |
| C13 | 0.8669(2)   | 0.9461(2)   |
| C14 | 0.9581(3)   | 0.9852(2)   |
| C15 | 0.8275(3)   | 0.9870(2)   |
| C16 | 0.8858(3)   | 0.8600(2)   |
| C17 | 0.7390(2)   | 0.39768(18) |
| C18 | 0.8318(2)   | 0.36783(19) |
| C19 | 0.9044(2)   | 0.4185(2)   |
| C20 | 0.9888(3)   | 0.3897(2)   |
| C21 | 0.9995(3)   | 0.3102(2)   |
| C22 | 0.9249(3)   | 0.2629(2)   |
| C23 | 0.5570(2)   | 0.34886(19) |
| C24 | 0.4682(2)   | 0.3076(2)   |
| C25 | 0.5388(3)   | 0.4364(2)   |
| C26 | 0.5886(3)   | 0.3166(2)   |
| C27 | 0.6164(2)   | 0.34935(19) |
| C28 | 0.5592(2)   | 0.2817(2)   |
| C29 | 0.5636(2)   | 0.4257(2)   |
| C30 | 0.7046(2)   | 0.3552(2)   |
| Ir1 | 0.79327(2)  | 0.06799(2)  |
| Ir2 | 0.72903(2)  | 0.21430(2)  |
| N1  | 0.7951(2)   | 0.98881(16) |
| N2  | 0.84175(19) | 0.29001(17) |
| O1  | 0.7820(2)   | 0.16911(15) |
| O2  | 0.56874(19) | 0.11211(15) |
| P1  | 0.79013(6)  | 0.95754(5)  |
| P2  | 0.64995(6)  | 0.32717(5)  |
| C31 | 0.6847(3)   | 0.6551(2)   |
| F1  | 0.6333(2)   | 0.59727(16) |
| F2  | 0.6356(2)   | 0.71982(14) |
| F3  | 0.7501(2)   | 0.66503(17) |
| O3  | 0.65813(19) | 0.62435(18) |

---



|     |             |             |
|-----|-------------|-------------|
| O4  | 0.7893(2)   | 0.56646(16) |
| O5  | 0.78679(18) | 0.70527(15) |
| S1  | 0.73585(6)  | 0.63550(5)  |
| C32 | 0.9013(3)   | 0.2899(3)   |
| Cl1 | 0.93252(9)  | 0.36751(10) |
| Cl2 | 0.97569(9)  | 0.21009(9)  |

**Table S4.** Bond lengths (Å) for **11-CO**.

|          |          |          |          |
|----------|----------|----------|----------|
| C1-O1    | 1.160(4) | C1-Ir1   | 1.817(4) |
| C2-O2    | 1.154(4) | C2-Ir2   | 1.823(4) |
| C3-C4    | 1.496(5) | C3-P1    | 1.847(3) |
| C3-H3A   | 0.99     | C3-H3AB  | 0.99     |
| C4-N1    | 1.365(4) | C4-C5    | 1.384(5) |
| C5-C6    | 1.383(5) | C5-H5    | 0.95     |
| C6-C7    | 1.378(5) | C6-H6    | 0.95     |
| C7-C8    | 1.377(5) | C7-H7    | 0.95     |
| C8-N1    | 1.361(4) | C8-H8    | 0.95     |
| C9-C12   | 1.531(5) | C9-C11   | 1.538(5) |
| C9-C10   | 1.541(5) | C9-P1    | 1.880(3) |
| C10-H10A | 0.98     | C10-H10B | 0.98     |
| C10-H10C | 0.98     | C11-H11A | 0.98     |
| C11-H11B | 0.98     | C11-H11C | 0.98     |
| C12-H12A | 0.98     | C12-H12B | 0.98     |
| C12-H12C | 0.98     | C13-C15  | 1.537(5) |
| C13-C14  | 1.539(5) | C13-C16  | 1.541(5) |
| C13-P1   | 1.871(3) | C14-H14A | 0.98     |
| C14-H14B | 0.98     | C14-H14C | 0.98     |
| C15-H15A | 0.98     | C15-H15B | 0.98     |
| C15-H15C | 0.98     | C16-H16A | 0.98     |
| C16-H16B | 0.98     | C16-H16C | 0.98     |
| C17-C18  | 1.506(5) | C17-P2   | 1.832(3) |
| C17-H17A | 0.99     | C17-H17B | 0.99     |
| C18-N2   | 1.355(4) | C18-C19  | 1.388(5) |

|          |           |          |           |
|----------|-----------|----------|-----------|
| C19-C20  | 1.375(5)  | C19-H19  | 0.95      |
| C20-C21  | 1.387(5)  | C20-H20  | 0.95      |
| C21-C22  | 1.377(5)  | C21-H21  | 0.95      |
| C22-N2   | 1.354(4)  | C22-H22  | 0.95      |
| C23-C26  | 1.531(5)  | C23-C24  | 1.537(5)  |
| C23-C25  | 1.537(5)  | C23-P2   | 1.875(3)  |
| C24-H24A | 0.98      | C24-H24B | 0.98      |
| C24-H24C | 0.98      | C25-H25A | 0.98      |
| C25-H25B | 0.98      | C25-H25C | 0.98      |
| C26-H26A | 0.98      | C26-H26B | 0.98      |
| C26-H26C | 0.98      | C27-C29  | 1.533(5)  |
| C27-C28  | 1.537(5)  | C27-C30  | 1.540(5)  |
| C27-P2   | 1.873(3)  | C28-H28A | 0.98      |
| C28-H28B | 0.98      | C28-H28C | 0.98      |
| C29-H29A | 0.98      | C29-H29B | 0.98      |
| C29-H29C | 0.98      | C30-H30A | 0.98      |
| C30-H30B | 0.98      | C30-H30C | 0.98      |
| Ir1-N1   | 2.124(3)  | Ir1-P1   | 2.2571(9) |
| Ir1-Ir2  | 2.8579(3) | Ir1-H1   | 1.79(4)   |
| Ir2-N2   | 2.122(3)  | Ir2-P2   | 2.2667(9) |
| Ir2-H1   | 1.80(4)   | C31-F1   | 1.319(5)  |
| C31-F2   | 1.327(5)  | C31-F3   | 1.354(5)  |
| C31-S1   | 1.820(4)  | O3-S1    | 1.434(3)  |
| O4-S1    | 1.440(3)  | O5-S1    | 1.438(3)  |
| C32-C11  | 1.750(5)  | C32-C12  | 1.761(5)  |
| C32-H32A | 0.99      | C32-H32B | 0.99      |

**Table S5.** Bond angles (°) for **11-CO**.

|            |          |             |          |
|------------|----------|-------------|----------|
| O1-C1-Ir1  | 176.6(3) | O2-C2-Ir2   | 179.0(4) |
| C4-C3-P1   | 110.5(2) | C4-C3-H3A   | 109.6    |
| P1-C3-H3A  | 109.6    | C4-C3-H3AB  | 109.6    |
| P1-C3-H3AB | 109.6    | H3A-C3-H3AB | 108.1    |
| N1-C4-C5   | 120.8(3) | N1-C4-C3    | 118.1(3) |

---

|               |          |               |          |
|---------------|----------|---------------|----------|
| C5-C4-C3      | 121.0(3) | C6-C5-C4      | 120.6(3) |
| C6-C5-H5      | 119.7    | C4-C5-H5      | 119.7    |
| C7-C6-C5      | 118.6(3) | C7-C6-H6      | 120.7    |
| C5-C6-H6      | 120.7    | C8-C7-C6      | 119.2(4) |
| C8-C7-H7      | 120.4    | C6-C7-H7      | 120.4    |
| N1-C8-C7      | 122.8(3) | N1-C8-H8      | 118.6    |
| C7-C8-H8      | 118.6    | C12-C9-C11    | 109.6(3) |
| C12-C9-C10    | 108.3(3) | C11-C9-C10    | 107.4(3) |
| C12-C9-P1     | 115.5(2) | C11-C9-P1     | 108.7(2) |
| C10-C9-P1     | 107.0(2) | C9-C10-H10A   | 109.5    |
| C9-C10-H10B   | 109.5    | H10A-C10-H10B | 109.5    |
| C9-C10-H10C   | 109.5    | H10A-C10-H10C | 109.5    |
| H10B-C10-H10C | 109.5    | C9-C11-H11A   | 109.5    |
| C9-C11-H11B   | 109.5    | H11A-C11-H11B | 109.5    |
| C9-C11-H11C   | 109.5    | H11A-C11-H11C | 109.5    |
| H11B-C11-H11C | 109.5    | C9-C12-H12A   | 109.5    |
| C9-C12-H12B   | 109.5    | H12A-C12-H12B | 109.5    |
| C9-C12-H12C   | 109.5    | H12A-C12-H12C | 109.5    |
| H12B-C12-H12C | 109.5    | C15-C13-C14   | 107.9(3) |
| C15-C13-C16   | 109.7(3) | C14-C13-C16   | 108.1(3) |
| C15-C13-P1    | 111.1(2) | C14-C13-P1    | 107.7(2) |
| C16-C13-P1    | 112.2(2) | C13-C14-H14A  | 109.5    |
| C13-C14-H14B  | 109.5    | H14A-C14-H14B | 109.5    |
| C13-C14-H14C  | 109.5    | H14A-C14-H14C | 109.5    |
| H14B-C14-H14C | 109.5    | C13-C15-H15A  | 109.5    |
| C13-C15-H15B  | 109.5    | H15A-C15-H15B | 109.5    |
| C13-C15-H15C  | 109.5    | H15A-C15-H15C | 109.5    |
| H15B-C15-H15C | 109.5    | C13-C16-H16A  | 109.5    |
| C13-C16-H16B  | 109.5    | H16A-C16-H16B | 109.5    |
| C13-C16-H16C  | 109.5    | H16A-C16-H16C | 109.5    |
| H16B-C16-H16C | 109.5    | C18-C17-P2    | 111.4(2) |
| C18-C17-H17A  | 109.3    | P2-C17-H17A   | 109.3    |
| C18-C17-H17B  | 109.3    | P2-C17-H17B   | 109.3    |
| H17A-C17-H17B | 108.0    | N2-C18-C19    | 121.6(3) |

---

|               |            |               |           |
|---------------|------------|---------------|-----------|
| N2-C18-C17    | 117.5(3)   | C19-C18-C17   | 120.9(3)  |
| C20-C19-C18   | 119.7(3)   | C20-C19-H19   | 120.1     |
| C18-C19-H19   | 120.1      | C19-C20-C21   | 119.2(3)  |
| C19-C20-H20   | 120.4      | C21-C20-H20   | 120.4     |
| C22-C21-C20   | 118.4(4)   | C22-C21-H21   | 120.8     |
| C20-C21-H21   | 120.8      | N2-C22-C21    | 123.2(3)  |
| N2-C22-H22    | 118.4      | C21-C22-H22   | 118.4     |
| C26-C23-C24   | 108.5(3)   | C26-C23-C25   | 108.3(3)  |
| C24-C23-C25   | 109.4(3)   | C26-C23-P2    | 106.5(2)  |
| C24-C23-P2    | 111.0(2)   | C25-C23-P2    | 113.0(2)  |
| C23-C24-H24A  | 109.5      | C23-C24-H24B  | 109.5     |
| H24A-C24-H24B | 109.5      | C23-C24-H24C  | 109.5     |
| H24A-C24-H24C | 109.5      | H24B-C24-H24C | 109.5     |
| C23-C25-H25A  | 109.5      | C23-C25-H25B  | 109.5     |
| H25A-C25-H25B | 109.5      | C23-C25-H25C  | 109.5     |
| H25A-C25-H25C | 109.5      | H25B-C25-H25C | 109.5     |
| C23-C26-H26A  | 109.5      | C23-C26-H26B  | 109.5     |
| H26A-C26-H26B | 109.5      | C23-C26-H26C  | 109.5     |
| H26A-C26-H26C | 109.5      | H26B-C26-H26C | 109.5     |
| C29-C27-C28   | 109.5(3)   | C29-C27-C30   | 108.4(3)  |
| C28-C27-C30   | 108.6(3)   | C29-C27-P2    | 114.0(2)  |
| C28-C27-P2    | 109.2(2)   | C30-C27-P2    | 107.2(2)  |
| C27-C28-H28A  | 109.5      | C27-C28-H28B  | 109.5     |
| H28A-C28-H28B | 109.5      | C27-C28-H28C  | 109.5     |
| H28A-C28-H28C | 109.5      | H28B-C28-H28C | 109.5     |
| C27-C29-H29A  | 109.5      | C27-C29-H29B  | 109.5     |
| H29A-C29-H29B | 109.5      | C27-C29-H29C  | 109.5     |
| H29A-C29-H29C | 109.5      | H29B-C29-H29C | 109.5     |
| C27-C30-H30A  | 109.5      | C27-C30-H30B  | 109.5     |
| H30A-C30-H30B | 109.5      | C27-C30-H30C  | 109.5     |
| H30A-C30-H30C | 109.5      | H30B-C30-H30C | 109.5     |
| C1-Ir1-N1     | 176.55(13) | C1-Ir1-P1     | 94.30(11) |
| N1-Ir1-P1     | 82.84(8)   | C1-Ir1-Ir2    | 74.08(11) |
| N1-Ir1-Ir2    | 107.89(8)  | P1-Ir1-Ir2    | 156.60(2) |

|              |            |               |            |
|--------------|------------|---------------|------------|
| C1-Ir1-H1    | 97.3(13)   | N1-Ir1-H1     | 85.9(13)   |
| P1-Ir1-H1    | 165.3(13)  | Ir2-Ir1-H1    | 37.5(13)   |
| C2-Ir2-N2    | 177.44(14) | C2-Ir2-P2     | 96.16(11)  |
| N2-Ir2-P2    | 82.42(8)   | C2-Ir2-Ir1    | 78.16(11)  |
| N2-Ir2-Ir1   | 104.03(8)  | P2-Ir2-Ir1    | 154.48(2)  |
| C2-Ir2-H1    | 97.6(13)   | N2-Ir2-H1     | 83.5(13)   |
| P2-Ir2-H1    | 164.7(13)  | Ir1-Ir2-H1    | 37.3(13)   |
| C8-N1-C4     | 118.0(3)   | C8-N1-Ir1     | 122.1(2)   |
| C4-N1-Ir1    | 119.7(2)   | C22-N2-C18    | 117.8(3)   |
| C22-N2-Ir2   | 121.6(2)   | C18-N2-Ir2    | 120.6(2)   |
| C3-P1-C13    | 103.90(15) | C3-P1-C9      | 106.41(16) |
| C13-P1-C9    | 112.01(16) | C3-P1-Ir1     | 100.64(11) |
| C13-P1-Ir1   | 120.21(11) | C9-P1-Ir1     | 111.70(11) |
| C17-P2-C27   | 105.58(15) | C17-P2-C23    | 103.85(15) |
| C27-P2-C23   | 112.67(15) | C17-P2-Ir2    | 100.73(11) |
| C27-P2-Ir2   | 111.55(11) | C23-P2-Ir2    | 120.25(11) |
| F1-C31-F2    | 108.8(4)   | F1-C31-F3     | 106.3(3)   |
| F2-C31-F3    | 106.7(3)   | F1-C31-S1     | 112.5(3)   |
| F2-C31-S1    | 111.8(3)   | F3-C31-S1     | 110.4(3)   |
| O3-S1-O5     | 114.76(18) | O3-S1-O4      | 114.40(18) |
| O5-S1-O4     | 115.55(17) | O3-S1-C31     | 102.79(19) |
| O5-S1-C31    | 102.88(18) | O4-S1-C31     | 104.11(19) |
| C11-C32-C12  | 112.6(3)   | C11-C32-H32A  | 109.1      |
| C12-C32-H32A | 109.1      | C11-C32-H32B  | 109.1      |
| C12-C32-H32B | 109.1      | H32A-C32-H32B | 107.8      |

**Table S6.** Torsion angles (°) for **11-CO**.

|             |         |               |           |
|-------------|---------|---------------|-----------|
| P1-C3-C4-N1 | 24.4(4) | P1-C3-C4-C5   | -155.7(3) |
| N1-C4-C5-C6 | 0.0(5)  | C3-C4-C5-C6   | -179.8(3) |
| C4-C5-C6-C7 | 0.0(6)  | C5-C6-C7-C8   | 0.3(6)    |
| C6-C7-C8-N1 | -0.7(6) | P2-C17-C18-N2 | 20.9(4)   |

|                 |           |                 |           |
|-----------------|-----------|-----------------|-----------|
| P2-C17-C18-C19  | -159.5(3) | N2-C18-C19-C20  | 0.4(5)    |
| C17-C18-C19-C20 | -179.1(3) | C18-C19-C20-C21 | -1.2(6)   |
| C19-C20-C21-C22 | 0.7(6)    | C20-C21-C22-N2  | 0.7(6)    |
| C7-C8-N1-C4     | 0.7(5)    | C7-C8-N1-Ir1    | -174.8(3) |
| C5-C4-N1-C8     | -0.4(5)   | C3-C4-N1-C8     | 179.5(3)  |
| C5-C4-N1-Ir1    | 175.2(3)  | C3-C4-N1-Ir1    | -4.9(4)   |
| C21-C22-N2-C18  | -1.5(6)   | C21-C22-N2-Ir2  | -179.8(3) |
| C19-C18-N2-C22  | 0.9(5)    | C17-C18-N2-C22  | -179.6(3) |
| C19-C18-N2-Ir2  | 179.3(3)  | C17-C18-N2-Ir2  | -1.2(4)   |
| C4-C3-P1-C13    | -154.6(2) | C4-C3-P1-C9     | 87.0(3)   |
| C4-C3-P1-Ir1    | -29.6(3)  | C15-C13-P1-C3   | -167.5(2) |
| C14-C13-P1-C3   | 74.5(3)   | C16-C13-P1-C3   | -44.3(3)  |
| C15-C13-P1-C9   | -53.0(3)  | C14-C13-P1-C9   | -171.1(2) |
| C16-C13-P1-C9   | 70.1(3)   | C15-C13-P1-Ir1  | 81.1(3)   |
| C14-C13-P1-Ir1  | -36.9(3)  | C16-C13-P1-Ir1  | -155.7(2) |
| C12-C9-P1-C3    | 72.9(3)   | C11-C9-P1-C3    | -163.5(2) |
| C10-C9-P1-C3    | -47.8(3)  | C12-C9-P1-C13   | -40.0(3)  |
| C11-C9-P1-C13   | 83.6(3)   | C10-C9-P1-C13   | -160.7(2) |
| C12-C9-P1-Ir1   | -178.2(2) | C11-C9-P1-Ir1   | -54.6(3)  |
| C10-C9-P1-Ir1   | 61.1(2)   | C18-C17-P2-C27  | 88.4(3)   |
| C18-C17-P2-C23  | -152.8(2) | C18-C17-P2-Ir2  | -27.8(2)  |
| C29-C27-P2-C17  | 70.8(3)   | C28-C27-P2-C17  | -166.5(2) |
| C30-C27-P2-C17  | -49.1(3)  | C29-C27-P2-C23  | -41.9(3)  |
| C28-C27-P2-C23  | 80.8(3)   | C30-C27-P2-C23  | -161.8(2) |
| C29-C27-P2-Ir2  | 179.3(2)  | C28-C27-P2-Ir2  | -58.0(2)  |
| C30-C27-P2-Ir2  | 59.4(2)   | C26-C23-P2-C17  | 74.7(3)   |
| C24-C23-P2-C17  | -167.4(2) | C25-C23-P2-C17  | -44.2(3)  |
| C26-C23-P2-C27  | -171.6(2) | C24-C23-P2-C27  | -53.7(3)  |
| C25-C23-P2-C27  | 69.6(3)   | C26-C23-P2-Ir2  | -36.8(3)  |
| C24-C23-P2-Ir2  | 81.1(2)   | C25-C23-P2-Ir2  | -155.6(2) |
| F1-C31-S1-O3    | -59.8(4)  | F2-C31-S1-O3    | 63.1(3)   |
| F3-C31-S1-O3    | -178.3(3) | F1-C31-S1-O5    | -179.3(3) |
| F2-C31-S1-O5    | -56.4(3)  | F3-C31-S1-O5    | 62.2(3)   |
| F1-C31-S1-O4    | 59.8(4)   | F2-C31-S1-O4    | -177.3(3) |

**Table S7.** Anisotropic atomic displacement parameters ( $\text{\AA}^2$ ) for **11-CO**.

The anisotropic atomic displacement factor exponent takes the form:  $-2\pi^2[h^2 a^{*2} U_{11} + \dots + 2 h k a^* b^* U_{12}]$

|     | $U_{11}$   | $U_{22}$   | $U_{33}$   | $U_{23}$    | $U_{13}$    | $U_{12}$    |
|-----|------------|------------|------------|-------------|-------------|-------------|
| C1  | 0.0198(18) | 0.0116(16) | 0.0219(18) | 0.0029(14)  | 0.0013(15)  | -0.0001(14) |
| C2  | 0.0168(18) | 0.0119(16) | 0.027(2)   | 0.0003(14)  | 0.0019(15)  | 0.0066(14)  |
| C3  | 0.0166(17) | 0.0101(15) | 0.0164(17) | 0.0004(12)  | 0.0047(13)  | 0.0063(13)  |
| C4  | 0.0143(16) | 0.0145(16) | 0.0150(16) | 0.0000(13)  | 0.0047(13)  | -0.0001(13) |
| C5  | 0.0241(19) | 0.0094(15) | 0.0231(19) | -0.0010(14) | 0.0042(15)  | 0.0010(14)  |
| C6  | 0.041(2)   | 0.0198(19) | 0.0181(19) | -0.0049(15) | 0.0054(17)  | 0.0003(17)  |
| C7  | 0.050(3)   | 0.0210(19) | 0.0139(18) | 0.0002(15)  | 0.0010(18)  | 0.0024(19)  |
| C8  | 0.025(2)   | 0.0189(18) | 0.0189(18) | 0.0049(14)  | 0.0027(15)  | 0.0027(15)  |
| C9  | 0.0129(16) | 0.0142(16) | 0.0204(17) | -0.0008(14) | 0.0054(13)  | 0.0016(13)  |
| C10 | 0.0176(18) | 0.0217(18) | 0.0217(19) | -0.0013(15) | 0.0013(15)  | -0.0067(15) |
| C11 | 0.0151(17) | 0.0199(18) | 0.0246(19) | -0.0039(15) | 0.0048(15)  | 0.0021(14)  |
| C12 | 0.0224(19) | 0.0192(18) | 0.0242(19) | 0.0017(15)  | 0.0090(16)  | -0.0009(15) |
| C13 | 0.0151(17) | 0.0194(17) | 0.0126(16) | 0.0009(13)  | 0.0003(13)  | 0.0016(14)  |
| C14 | 0.0182(19) | 0.029(2)   | 0.0222(19) | 0.0005(16)  | -0.0024(15) | 0.0003(16)  |
| C15 | 0.0215(19) | 0.0252(19) | 0.0146(17) | -0.0008(15) | 0.0020(15)  | 0.0023(16)  |
| C16 | 0.027(2)   | 0.0236(19) | 0.0187(18) | 0.0028(15)  | 0.0008(16)  | 0.0065(16)  |
| C17 | 0.0132(16) | 0.0080(14) | 0.0212(18) | 0.0011(13)  | 0.0014(14)  | -0.0008(12) |
| C18 | 0.0129(16) | 0.0134(16) | 0.0185(17) | -0.0015(13) | 0.0044(14)  | 0.0009(13)  |
| C19 | 0.0183(18) | 0.0139(16) | 0.0252(19) | -0.0042(14) | 0.0046(15)  | -0.0021(14) |
| C20 | 0.0138(18) | 0.0234(19) | 0.034(2)   | -0.0094(17) | 0.0030(16)  | -0.0060(15) |
| C21 | 0.0117(17) | 0.023(2)   | 0.043(3)   | -0.0077(18) | 0.0005(17)  | 0.0034(15)  |
| C22 | 0.0181(18) | 0.0166(17) | 0.032(2)   | -0.0020(15) | 0.0028(16)  | 0.0067(14)  |
| C23 | 0.0137(16) | 0.0130(15) | 0.0133(16) | -0.0007(13) | -0.0021(13) | 0.0014(13)  |
| C24 | 0.0159(17) | 0.0200(18) | 0.0209(18) | -0.0005(14) | -0.0039(14) | -0.0002(14) |
| C25 | 0.0221(18) | 0.0167(17) | 0.0177(17) | 0.0018(14)  | -0.0033(14) | 0.0031(15)  |
| C26 | 0.028(2)   | 0.0191(18) | 0.0122(16) | -0.0015(14) | -0.0010(15) | 0.0031(15)  |
| C27 | 0.0162(16) | 0.0118(15) | 0.0098(15) | -0.0014(12) | -0.0009(13) | 0.0013(13)  |

|     |            |            |            |             |             |             |
|-----|------------|------------|------------|-------------|-------------|-------------|
| C28 | 0.0225(18) | 0.0173(17) | 0.0133(16) | 0.0039(14)  | 0.0044(14)  | -0.0023(15) |
| C29 | 0.0193(18) | 0.0181(17) | 0.0175(17) | -0.0001(14) | 0.0032(14)  | 0.0054(14)  |
| C30 | 0.0200(18) | 0.0230(18) | 0.0145(16) | -0.0045(15) | -0.0046(14) | 0.0078(15)  |
| Ir1 | 0.01283(6) | 0.00803(6) | 0.01419(6) | -0.00036(5) | 0.00234(5)  | 0.00127(5)  |
| Ir2 | 0.01194(6) | 0.00784(6) | 0.01507(6) | -0.00050(5) | 0.00226(5)  | 0.00100(5)  |
| N1  | 0.0197(15) | 0.0122(13) | 0.0132(14) | 0.0020(11)  | 0.0045(12)  | 0.0020(12)  |
| N2  | 0.0136(14) | 0.0136(14) | 0.0239(16) | -0.0030(12) | 0.0033(12)  | 0.0017(12)  |
| O1  | 0.0412(18) | 0.0160(13) | 0.0230(14) | -0.0061(11) | 0.0055(13)  | 0.0022(12)  |
| O2  | 0.0212(15) | 0.0177(14) | 0.0514(19) | -0.0046(13) | -0.0009(13) | -0.0040(11) |
| P1  | 0.0119(4)  | 0.0093(4)  | 0.0123(4)  | -0.0007(3)  | 0.0023(3)   | 0.0021(3)   |
| P2  | 0.0106(4)  | 0.0088(4)  | 0.0122(4)  | -0.0002(3)  | 0.0015(3)   | 0.0000(3)   |
| C31 | 0.044(3)   | 0.024(2)   | 0.0174(19) | -0.0020(16) | -0.0009(18) | -0.0041(19) |
| F1  | 0.093(3)   | 0.0321(15) | 0.0386(16) | -0.0003(12) | -0.0337(16) | -0.0232(16) |
| F2  | 0.0638(19) | 0.0237(13) | 0.0358(15) | 0.0068(11)  | -0.0136(13) | 0.0081(13)  |
| F3  | 0.107(3)   | 0.0476(18) | 0.0370(17) | -0.0072(14) | 0.0396(18)  | -0.0135(18) |
| O3  | 0.0239(15) | 0.0428(18) | 0.0320(16) | 0.0076(14)  | 0.0064(13)  | -0.0045(13) |
| O4  | 0.0305(16) | 0.0165(14) | 0.055(2)   | -0.0066(13) | -0.0002(15) | 0.0078(12)  |
| O5  | 0.0198(14) | 0.0190(14) | 0.0418(17) | -0.0076(12) | -0.0037(12) | -0.0034(11) |
| S1  | 0.0162(4)  | 0.0129(4)  | 0.0232(5)  | -0.0016(3)  | -0.0006(4)  | -0.0001(3)  |
| C32 | 0.023(2)   | 0.038(3)   | 0.052(3)   | -0.012(2)   | 0.005(2)    | 0.0004(19)  |
| Cl1 | 0.0410(7)  | 0.0929(11) | 0.0357(7)  | 0.0189(7)   | -0.0006(6)  | 0.0025(7)   |
| Cl2 | 0.0420(7)  | 0.0600(9)  | 0.0840(11) | -0.0333(8)  | -0.0186(7)  | 0.0204(7)   |

**Table S8.** Hydrogen atomic coordinates and isotropic atomic displacement parameters ( $\text{\AA}^2$ ) for **11-CO**.

|      | <b>x/a</b> | <b>y/b</b> | <b>z/c</b> | <b>U(eq)</b> |
|------|------------|------------|------------|--------------|
| H3A  | 0.9021     | -0.1163    | 0.4655     | 0.017        |
| H3AB | 0.8092     | -0.1649    | 0.4617     | 0.017        |
| H5   | 0.8180     | -0.1952    | 0.3110     | 0.023        |
| H6   | 0.7811     | -0.1551    | 0.1717     | 0.031        |
| H7   | 0.7528     | -0.0230    | 0.1442     | 0.034        |
| H8   | 0.7634     | 0.0647     | 0.2545     | 0.025        |
| H10A | 0.6274     | -0.0425    | 0.4134     | 0.031        |
| H10B | 0.5590     | -0.1018    | 0.4512     | 0.031        |



---

|      |        |         |        |       |
|------|--------|---------|--------|-------|
| H10C | 0.6530 | -0.1327 | 0.4227 | 0.031 |
| H11A | 0.6193 | 0.0390  | 0.5366 | 0.03  |
| H11B | 0.6517 | 0.0082  | 0.6295 | 0.03  |
| H11C | 0.5576 | -0.0216 | 0.5811 | 0.03  |
| H12A | 0.5970 | -0.1611 | 0.5889 | 0.032 |
| H12B | 0.6867 | -0.1370 | 0.6484 | 0.032 |
| H12C | 0.6947 | -0.1899 | 0.5672 | 0.032 |
| H14A | 0.9843 | -0.0395 | 0.5661 | 0.035 |
| H14B | 1.0002 | -0.0206 | 0.6646 | 0.035 |
| H14C | 0.9481 | 0.0405  | 0.6011 | 0.035 |
| H15A | 0.8135 | 0.0412  | 0.6837 | 0.031 |
| H15B | 0.8721 | -0.0145 | 0.7489 | 0.031 |
| H15C | 0.7717 | -0.0396 | 0.7109 | 0.031 |
| H16A | 0.9133 | -0.1654 | 0.6020 | 0.035 |
| H16B | 0.8285 | -0.1661 | 0.6562 | 0.035 |
| H16C | 0.9275 | -0.1433 | 0.6997 | 0.035 |
| H17A | 0.7373 | 0.4085  | 0.3049 | 0.017 |
| H17B | 0.7271 | 0.4470  | 0.3945 | 0.017 |
| H19  | 0.8957 | 0.4729  | 0.4091 | 0.023 |
| H20  | 1.0391 | 0.4238  | 0.4567 | 0.028 |
| H21  | 1.0570 | 0.2890  | 0.4777 | 0.032 |
| H22  | 0.9322 | 0.2085  | 0.4479 | 0.027 |
| H24A | 0.4234 | 0.3138  | 0.2633 | 0.029 |
| H24B | 0.4445 | 0.3306  | 0.3619 | 0.029 |
| H24C | 0.4802 | 0.2522  | 0.3228 | 0.029 |
| H25A | 0.5954 | 0.4628  | 0.2751 | 0.029 |
| H25B | 0.5162 | 0.4577  | 0.3355 | 0.029 |
| H25C | 0.4933 | 0.4445  | 0.2364 | 0.029 |
| H26A | 0.5431 | 0.3287  | 0.1682 | 0.03  |
| H26B | 0.5959 | 0.2601  | 0.2205 | 0.03  |
| H26C | 0.6469 | 0.3403  | 0.2062 | 0.03  |
| H28A | 0.5028 | 0.2772  | 0.4808 | 0.026 |
| H28B | 0.5444 | 0.2917  | 0.5761 | 0.026 |
| H28C | 0.5939 | 0.2332  | 0.5178 | 0.026 |

---

|      |          |          |          |           |
|------|----------|----------|----------|-----------|
| H29A | 0.5983   | 0.4683   | 0.4731   | 0.027     |
| H29B | 0.5541   | 0.4363   | 0.5534   | 0.027     |
| H29C | 0.5045   | 0.4212   | 0.4608   | 0.027     |
| H30A | 0.7398   | 0.3072   | 0.5474   | 0.029     |
| H30B | 0.6895   | 0.3626   | 0.6080   | 0.029     |
| H30C | 0.7407   | 0.3994   | 0.5342   | 0.029     |
| H32A | 0.8389   | 0.2730   | 0.6963   | 0.045     |
| H32B | 0.9004   | 0.3079   | 0.7760   | 0.045     |
| H1   | 0.816(3) | 0.142(2) | 0.375(2) | 0.029(11) |

**Table S9.** CO Reformation of **10**

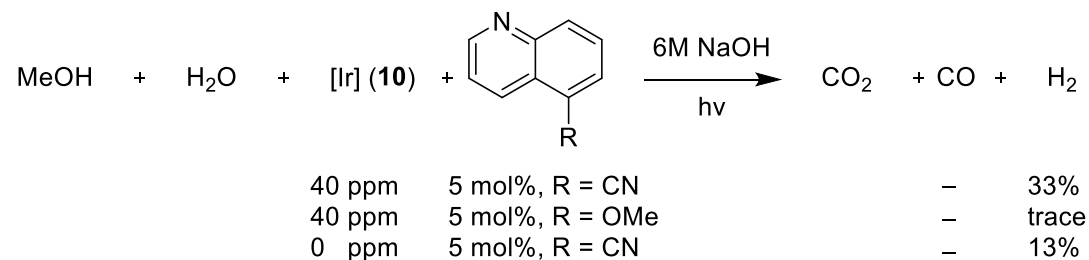

Conditions: 1 mL MeOH, 3 mL H<sub>2</sub>O, 300 nm hv, room temp. CO collected as NaCO<sub>3</sub>. No reaction observed without hv, NaOH, and quinoline all present.
